1 Nitrogen-limitation independent control of *glnA* (glutamine synthetase) expression in  
2 *Escherichia coli* by urea, several amino acids, and post-transcriptional regulation.

3

4 Karthik Urs<sup>a</sup>, Philippe E. Zimmern<sup>b</sup>, and Larry Reitzer<sup>a#</sup>

5

6 <sup>a</sup> Department of Biological Sciences, University of Texas at Dallas, Richardson, Texas,  
7 USA

8 <sup>b</sup> Department of Urology, University of Texas Southwestern Medical School, Dallas,  
9 Texas, USA

10

11 Running title: Urea induction of glutamine synthetase

12

13 Key words: *Escherichia coli*, urinary tract infections, glutamine synthetase, urea

14

15 # Address correspondence to Larry Reitzer, [reitzer@utdallas.edu](mailto:reitzer@utdallas.edu)

16

17 [Karthik.urs@utdallas.edu](mailto:Karthik.urs@utdallas.edu); The University of Texas Dallas; Department of Biological  
18 Sciences

19 [Philippe.zimmern@utsouthwestern.edu](mailto:Philippe.zimmern@utsouthwestern.edu); University of Texas Southwestern Medical  
20 Center; Department of Urology

21 [Reitzer@utdallas.edu](mailto:Reitzer@utdallas.edu); The University of Texas Dallas; Department of Biological Sciences

22

## 23 **Abstract**

24 The expression of *glnA* (ammonia-assimilating glutamine synthetase) is high for  
25 uropathogenic *E. coli* grown in urine. Because *glnA* is part of an operon that codes for  
26 regulators of the nitrogen-regulated (Ntr) response, high *glnA* expression has been  
27 interpreted to suggest nitrogen limitation, which is unexpected because of the high urinary  
28 ammonia concentration and the extremely rapid bacterial growth. We present evidence  
29 that *glnA* expression does not result from nitrogen limitation. First, in the presence of  
30 ammonia, urea induced expression of *glnA* from the cAMP receptor protein (Crp)-  
31 dependent *glnAp1* promoter, which circumvents control from the nitrogen-regulated  
32 *glnAp2* promoter. This urea effect on *glnA* expression has not been previously described.  
33 Second, the most abundant amino acids in urine inhibited GS activity, based on reversal  
34 of the inhibition by glutamate and glutamine, and increased *glnA* expression. The  
35 relevance of these inhibitory amino acids in natural environments has not been previously  
36 demonstrated. Third, neither urea nor the inhibitory amino acids induced other Ntr genes,  
37 i.e., high *glnA* expression can be independent of other Ntr genes. Finally, the urea-  
38 dependent induction did not result in GlnA synthesis because of a previously undescribed  
39 translational control. We conclude that *glnA* expression in urea-containing environments  
40 does not imply growth rate-limiting nitrogen restriction and is consistent with rapid growth  
41 of uropathogenic *E. coli*.

## 42 **Significance**

43 Urinary tract infections (UTIs), often caused by *E. coli*, frequently become resistant to  
44 antibiotic treatment. Expressed metabolic genes during an infection could guide  
45 development of urgently-needed alternate or adjunct therapies. *glnA* (glutamine

46 synthetase) is expressed during growth in urine, which implies growth-restricting nitrogen  
47 limitation. We show that *glnA* expression results from urinary amino acids that inhibit GlnA  
48 activity and urea, but not from nitrogen limitation. Urinary components will vary greatly  
49 between individuals which suggests corresponding variations in *glnA* expression. GlnA  
50 may be a metabolic vulnerability during UTIs, which may depend on a variable urinary  
51 composition. *glnA* expression may be important in a complex host-pathogen interaction,  
52 but may not be a good therapeutic target.

### 53 **Introduction**

54 Urinary tract infections (UTIs) are common bacterial infections and UTI-associated *E.*  
55 *coli* (UPEC) causes most UTIs (1-3). During an infection, UPEC strains cycle between the  
56 bladder lumen and intracellularly within uroepithelial cells (4). Rapid growth occurs in both  
57 environments and is considered a virulence factor. Rapid growth is reflected in gene  
58 expression patterns, such as high expression of genes for the translational machinery (4-  
59 6). Antibiotic treatment is often effective but continued antibiotic use increases the risk of  
60 generating multidrug resistant organisms that can ultimately impact the outcome of other  
61 clinically important diseases that are treated with the same antibiotics (2, 7-9). Alternate  
62 or adjunct therapies are urgently needed (2, 4, 10), but potential targets of therapy have  
63 been elusive, in part because of an incomplete understanding of virulence. Likely targets  
64 include proteins that are expressed during an infection.

65 The genes for ammonia and iron acquisition are induced during growth in urine which  
66 implies multiple nutrient limitations that should be incompatible with rapid growth (11-13).  
67 Nitrogen limitation is implied by high *glnA* expression which is unexpected because  
68 urinary ammonia is high (> 20 mM) (13). The *glnA* product, glutamine synthetase (GS),

69 catalyzes ATP-dependent glutamine synthesis from ammonia and glutamate. Multiple  
70 mechanisms control activity and synthesis of GS which is at the intersection of carbon  
71 and nitrogen metabolism (14). Figure 1 (black arrows) summarizes known regulation of  
72 GS activity and synthesis which includes direct inhibition of activity by several amino acids  
73 and nucleotides, a three-protein regulatory cascade that adenylylates and inactivates GS,  
74 transcriptional activation from the *glnAp1* promoter by carbon limitation, and  
75 transcriptional activation from the *glnAp2* promoter by nitrogen limitation. *glnA* is part of  
76 the *glnALG* operon that codes for regulators of a set of genes that respond to nitrogen  
77 limitation, which are collectively called Ntr (nitrogen-regulated) genes. Although not a  
78 direct regulatory factor, ammonia — a precursor for glutamine synthesis — suppresses  
79 *glnA* expression, except in urine.

80 Our goal was to determine the factor(s) that could induce *glnA* expression in an  
81 ammonia-containing environment. We show that both urea and GS-inhibiting amino  
82 acids, which are abundant in urine, affect *glnA* expression (Fig. 1), and unexpectedly  
83 observe a previously undescribed translational control. We present the first description of  
84 (a) the effect of urea on *glnA* expression, and (b) the physiological relevance of amino  
85 acid inhibition of GS activity.

## 86 **Results**

### 87 ***Abundant urinary amino acids inhibit growth and GS activity***

88 We grew UTI89 and W3110 in a minimal salts medium (MM) and a defined synthetic  
89 urine (SU) with basal components at urine-like concentrations. UTI89 and W3110 grew  
90 equally well in SU medium with glucose (Fig. 2), succinate (Fig. S1), and glycerol (Fig.

91 S1) as the carbon source. *ΔglnA* derivatives were grown as negative controls. Doubling  
92 times were comparable between MM and SU media for UTI89 (Table S1), while the  
93 doubling time was slightly faster in MM-ammonia medium for W3110 (Table S2). (Tables  
94 S1 and S2 have the doubling time and final cell densities for all growth experiments).

95 To more closely emulate urinary conditions, we supplemented SU medium with amino  
96 acids which total 5-7 mM in urine (13). SU supplementation with the 10 most abundant  
97 urinary amino acids (SU-10) did not affect UTI89 growth (Fig. 3A), but impaired W3110  
98 growth (Fig. 3B). SU supplementation with the five most abundant urinary amino acids  
99 (SU-5) impaired UTI89 growth (Fig. 3A) and eliminated W3110 growth (Fig. 3B).  
100 Glutamine reversed the inhibitory effect (Fig. S2) which is consistent with the known  
101 inhibition of GS activity by the amino acids in SU-5 medium (14).

102 Because SU-10 supports better growth than SU-5, we tested whether the GS  
103 substrate glutamate, which is present in SU-10, but not SU-5, could overcome the  
104 inhibitory effect of amino acids in SU-5. Glutamate improved growth in SU-5 for UTI89  
105 (Fig. 4A), but not for W3110 (Fig. 4B). Additional glutamate in SU-10 improved growth for  
106 W3110 which shows that glutamate was not toxic (Urs, K. and Reitzer, L. unpublished  
107 observation). Tryptone or casamino acids also improved growth in SU-5 for both UTI89  
108 and W3110, but the positive effect was only partial for W3110 and occurred after an  
109 extremely long lag phase (Figs. 4AB). In summary, urinary levels of several amino acids  
110 hinder growth and glutamate or glutamine overcomes the impairment which implies that  
111 the inhibitory amino acids block GS activity.

112 Urine consists of amino acids in free and peptide forms (13). Compared to free amino  
113 acids, dipeptides are transported rapidly into bacterial cells (15). A dipeptide containing

114 an inhibitory amino acid should have the same effect as the five most abundant amino  
115 acids in urine. We supplemented SU with the alanyl-leucine (AL) dipeptide (SU-AL) which  
116 should generate the inhibitory amino acid alanine after transport and hydrolysis. UTI89  
117 grown in SU-AL medium had a long lag phase which glutamate reduced (Fig. 4C). We  
118 conclude that the lag results from inhibition of GS. The AL dipeptide eliminated growth of  
119 W3110 in SU, which glutamate did not reverse (Urs, K. and Reitzer, L. unpublished  
120 observation). In summary, a single inhibitory amino acid can have the same effect as  
121 several inhibitory amino acids.

122 As a negative control for growth experiments, we grew  $\Delta glnA$  derivatives of UTI89  
123 and W3110, and as expected,  $\Delta glnA$  mutants failed to grow in any media with one  
124 exception: UTI89 $\Delta glnA$  displayed limited growth in SU-10 medium (Fig. 3A). We  
125 reconstructed UTI89 $\Delta glnA$  several times, and the mutants always displayed the same  
126 phenotype. Furthermore, GS activity was undetectable in these mutants (Urs, K. and  
127 Reitzer, L. unpublished observation). An analysis of this phenotype is beyond the scope  
128 of this paper.

### 129 ***Non-coordinate expression of *glnA* and the *Ntr* gene *nac* in urea-containing media***

130 To test the effects of urine-like conditions on *glnA* expression, we grew strains  
131 carrying a plasmid with a transcriptional fusion of the *glnA* promoter region (*glnA* has two  
132 promoters) to the gene for the green fluorescent protein (*gfp*). The fusion properly  
133 responded to nitrogen availability in both strains for growth in minimal media: *glnA*  
134 expression was high in MM-alanine medium (nitrogen limiting) and low in MM-ammonia  
135 medium (nitrogen excess) (Figs. 5AB and quantified in Figs. 6AB). In ammonia-containing  
136 SU and SU-10 media, *glnA* expression was comparable to the activated level in MM-

137 alanine in both strains (Figs. 5AB and 6AB). The presence of the 5 most abundant amino  
138 acids in urine or the alanyl-leucine dipeptide induced *glnA* expression about 3- to 4-fold  
139 higher than in SU medium (SU vs SU-5 and SU-AL), and glutamate reversed the increase  
140 (Figs. 6AB). In summary, *glnA* expression was induced by (a) amino acids that inhibit GS  
141 activity and (b) a component in SU medium.

142 Because SU medium does not contain amino acids that inhibit GS activity, induced  
143 *glnA* expression was unexpected. A major difference between SU and minimal media is  
144 urea. Addition of urea to MM-glucose-ammonia medium increased *glnA* expression 3-fold  
145 for both UT189 and W3110, and decreased *glnA* expression in nitrogen-limited MM-  
146 glucose-alanine medium which does not contain ammonia (Figs. 5CD and quantified in  
147 Figs. 7AB) (similar results were observed for MM-glycerol medium — Urs, K. and Reitzer,  
148 L. unpublished observation). Removal of urea from SU medium lowered *glnA* expression  
149 to the level for cells grown in MM-ammonia medium (Figs. 7AB), which would be expected  
150 for *glnA* expression in an ammonia-containing environment. The results of this section  
151 show that urea increased *glnA* expression in the presence of ammonia.

152 *glnA* is part of the *glnALG* operon, which encodes the regulators of the Ntr response  
153 (14). To test if other Ntr genes are activated in parallel with *glnA*, we assayed the  
154 expression of *nac* (nitrogen assimilation control) which codes for a transcriptional  
155 regulator that activates a subset of Ntr genes (14, 16). Unlike *glnA* expression, *nac*  
156 expression was low in SU, SU-10, and SU-5 media (Figs. 5EF). To ensure that the fusion  
157 is properly regulated, we examined *nac* expression in minimal medium and, as expected,  
158 *nac* expression was high in both strains during growth in MM-alanine and low during

159 growth in MM-ammonia (Figs. 5EF). In conclusion, *glnA* can be induced independent of  
160 other components of the Ntr response in synthetic urine.

161 ***glnA* expression from the Crp-dependent *glnAp1* promoter in urea-containing**  
162 ***media***

163 Transcription of *glnA* is initiated at either the Crp-dependent *glnAp1* or the GlnG-  
164 dependent *glnAp2* promoter (Fig. 8) (17). Crp and GlnG are the only regulators of *glnA*  
165 expression, at least in the tested growth media, because  $\Delta glnG\Delta crp$  double mutants of  
166 UTI89 and W3110, like  $\Delta glnA$  mutants, failed to grow (Fig. 9 and Figs. S3ABCD). The  
167  $\Delta crp$  mutants had an extended lag phase, often greater than 10 hours, for UTI89 and  
168 W3110 grown in SU (Fig. 9), and SU-10 and SU-5 (Fig. S3ABCD). Growth eventually  
169 occurred, but the final cell density was always less than the parental strains (Figs. 9 and  
170 S3). A *glnA*-containing plasmid eliminated the lag phase in the  $\Delta crp$  strains (Figs. 9 and  
171 S3). The  $\Delta glnG$  mutants did not have a lag phase and grew to approximately the same  
172 final cell density as the parental strains (Figs. 9 and S3). UTI89  $\Delta glnG$  grew slower than  
173 its parental strain, but W3110  $\Delta glnG$  grew as well as its parental strain (Figs. 9 and S3).  
174 Since GlnG-dependent transcription from *glnAp2* contributes to growth and *glnA*  
175 expression in a  $\Delta crp$  mutant only after an extended lag period, Crp-dependent  
176 transcription from *glnAp1* is effectively required, even if not absolutely required, for growth  
177 in urea-containing media.

178 ***Low glutamine synthetase activity and glnA translation during growth in urea-***  
179 ***containing media***



180 High *glnA* expression in SU medium is unexpected because of the high ammonia  
181 content. However, GS activity is very low and comparable to that in MM-ammonia (Figs.  
182 10AB). GS activity in MM-alanine is significantly higher in comparison to the activity seen  
183 in any SU medium. The assay measures total GS activity regardless of the adenylylation  
184 state. To test the possibility that translational control could explain low enzymatic activity  
185 in cells with high *glnA* transcription, we constructed a plasmid containing a *glnA-gfp*  
186 translational fusion. Growth in urea-containing media resulted in expression from the  
187 translational fusion that was much lower than in nitrogen-limited minimal medium (Fig.  
188 11), unlike expression from a *glnAp-gfp* transcriptional fusion (Fig. 6) for both UTI89 and  
189 W3110. In summary, elevated *glnA* transcription does not necessarily result in elevated  
190 GS synthesis.

## 191 **Discussion**

192 *glnA* expression is unexpectedly high for *E. coli* grown in urine, despite a high  
193 ammonia concentration, which was interpreted to suggest that urine is nitrogen limited  
194 (11, 12). Our results describe activation of *glnA* expression by abundant components in  
195 urine — urea and several amino acids — in the presence of ammonia. Glutamate and  
196 glutamine reversed the activation by amino acids, but did not reverse the urea-dependent  
197 activation. These results imply that the abundant urinary amino acids inhibited GS activity,  
198 but that urea acts by a different mechanism. Urea-dependent *glnA* expression was  
199 initiated from the *glnAp1* promoter and did not result in enzymatically active GS or  
200 induction of the Ntr response. We conclude that *glnA* expression for cells grown in urine  
201 does not imply nitrogen limitation.

202       **Urea-dependent stimulation of *glnA* expression.** The stimulatory effect of urea on  
203 *glnA* expression was observed for strains UTI89 and W3110 — members of phylogenetic  
204 groups B2 and A, respectively — which suggests that the urea effect is not strain specific.  
205 The mechanism of urea stimulation is unexpected because urea has been previously  
206 shown to inhibit expression from other cyclic-AMP-dependent promoters (18, 19).  
207 However, urea inhibited expression from the GlnG-dependent *glnAp2* promoter (lower  
208 *glnA* expression in MM-alanine medium with urea). Because transcription from *glnAp2*  
209 requires GlnG and supercoiled DNA (20, 21), one possibility is that a urea-dependent  
210 reduction of supercoiling in the *glnA* promoter region prevents one aspect of GlnG-  
211 dependent activation, such as binding to DNA, and consequent derepression from  
212 *glnAp1*. A second possibility is based on the known inhibition of *glnAp2* by Crp (22), if  
213 urea results in higher levels of cyclic-AMP, adenylate cyclase, or Crp. Regardless of  
214 mechanism, urea results in Crp-dependent *glnA* expression from *glnAp1*. Loss of Crp  
215 could result in a partial or complete glutamine auxotrophy for cells grown in a urinary  
216 environment, which could explain the attenuation of virulence of *crp* mutants in a mouse  
217 model (23). In this context, it should be noted that urinary urea in a mouse is six times  
218 higher than in humans (24), which could be a factor in mouse models of infection. Our  
219 results suggest that potential effects of urea on gene expression could contribute to  
220 virulence.

221       **Amino acid-dependent stimulation of *glnA* expression.** Several amino acids have  
222 been known to inhibit GS activity for over 50 years (25, 26), and the mechanism of  
223 inhibition — binding to the glutamate site — is also known (27). However, the bladder is  
224 the first natural environment where the inhibitory amino acids are not only present at a

225 high enough concentration to affect GS activity, but also *glnA* expression. This regulation  
226 is surprising because glutamate is by far the most abundant intracellular metabolite (28).  
227 However, alanine as the sole nitrogen source reduces intracellular glutamate (29), and  
228 the inhibitory amino acids may collectively have a similar effect. One of the inhibitory  
229 amino acids, alanine, has been previously shown to impair growth and alter gene  
230 expression in ammonia-containing minimal media (29, 30). Ikeda et al., citing unpublished  
231 results, argued that transcription in their ammonia-containing medium was initiated from  
232 the *glnAp2* promoter (29). If this conclusion is correct, then in the absence of urea the  
233 increase in *glnA* expression by our inhibitory amino acid mixture may result from  
234 transcription initiated from the *glnAp2* promoter (Fig 7). In the presence of urea, our  
235 results suggest that the inhibitory amino acids act via the *glnAp1* promoter because (a)  
236 the combined effects of urea and the amino acids were greater than urea alone (Fig. 7),  
237 (b) urea impaired expression from the *glnAp2* promoter (Fig. 7, nitrogen limiting medium),  
238 and (c) loss of *crp* impaired growth more than loss of *glnG* in urea-containing media (Figs.  
239 9 and S3). Although further experiments are required to more directly determine promoter  
240 usage during these conditions, our results clearly show that the inhibitory amino acids  
241 increase *glnA* expression regardless of media.

242 The responses to the inhibitory amino acids differed between UTI89 and W3110. SU-  
243 10 had no effect on UTI89 but inhibited growth of W3110, and SU-5 impaired growth of  
244 UTI89, and eliminated growth of W3110 (Fig 3). Our experience with these strains  
245 indicates that UTI89 and strains of phylogenetic group B2 in general grow faster in almost  
246 all media than W3110 and strains of phylogenetic group A (ref. (31) and Petter, A.,  
247 Hogins, J. and Reitzer, L. unpublished observation). Of the 5 inhibitory amino acids, *E.*

248 *coli* can degrade serine, glycine, alanine, and cysteine, but cannot degrade histidine (32,  
249 33). We suggest that the differential responses may result from faster transport and  
250 degradation of the inhibitory amino acids by UTI89 that diminishes their intracellular  
251 concentration and minimizes their effect on *glnA* expression.

252 **Translational control of *glnA* expression.** The unexpected and previously  
253 undescribed translational control of *glnA* was observed in urea-containing media (Fig.  
254 10). Physical or chemical factors, such as urea which affects *glnA* expression but is not  
255 a sensor of nitrogen metabolism, may necessitate an additional layer of regulation.  
256 However, the factors that control this regulation are not apparent.

257 **Concluding remarks.** A common assumption for analysis of pathogenic strains is  
258 that the regulation and physiology observed for growth in standard lab media for  
259 extensively passaged lab strains is the same as that for growth in natural environments.  
260 We provided evidence for previously undescribed aspects of nitrogen metabolism: urea-  
261 dependent stimulation of *glnA* expression, post-transcriptional control of *glnA* expression,  
262 and a curious observation that, superficially, is consistent with the possibility of *glnA*-  
263 independent glutamine synthesis, at least in UTI89. Study of *E. coli* strains other than  
264 laboratory strains in non-laboratory environments such as the bladder or bladder-like  
265 environments is likely to produce other surprises. For example, we showed *glnA* induction  
266 by the urinary components urea and several amino acids. GS and *glnA* would be a good  
267 therapeutic target for UTIs if urinary components were sufficiently high in all individuals  
268 to induce *glnA* expression. However, this is unlikely because of large variations in urinary  
269 components, changes in some components with age, and different levels of hydration  
270 that have the potential to dilute urinary components (13, 34). The initial interpretation that

271 growth of *E. coli* in urine is nitrogen limited would imply that components of the Ntr  
272 response would be good therapeutic targets. Our results on the factors that affect *glnA*  
273 expression and their variations in the urine of individuals would suggest that *glnA* is not a  
274 good therapeutic target.

## 275 **Material and Methods**

276 *Bacterial strains and plasmids:* All *E. coli* strains and plasmids used are listed in Table 1.  
277 Deletion alleles for  $\Delta glnG$  and  $\Delta crp$  were derived from the KEIO collection strains (35)  
278 and for  $\Delta glnA$  from TH16 (36). Deletions were transferred to background strains by P1  
279 transduction (37). Where necessary, the antibiotic resistance gene was removed using  
280 the pCP20 plasmid as described (38). Primers to check deletions are provided in Table  
281 S3. The low copy number plasmid pUA139 was obtained from the *E. coli* promoter  
282 collection, a library of fluorescent reporter strains carrying transcriptional fusions of GFP  
283 to different promoters in *E. coli* K12 strain MG1655 (39). Strains transformed with pUA139  
284 and its derivatives carrying the upstream promoter regions of either *glnA* or *nac* were  
285 used to monitor gene expression during growth. The plasmid pCA24N encoding *glnA*  
286 under the control of IPTG-inducible promoters was derived from the ASKA collection (40)  
287 and used to assess the effect of *glnA* overexpression during growth in the deletion  
288 mutants.

289 Plasmid pTE*glnA*, derived from pUA139, was constructed to monitor translational  
290 expression of *glnA* during growth. It carries the upstream promoter region of *glnA* along  
291 with an in-frame fusion of 72 base pairs (or 24 amino acids) of the N-terminal of GlnA to  
292 GFP. In brief, primers for separate *glnA* and *gfp* fragments were generated using the  
293 NEBuilder Assembly Tool ([neb.com](http://neb.com), New England Biolabs Inc., MA, USA). The fragments

294 carry overlapping segments to one another and with the pUA139 vector. PCR amplified  
295 fragments were assembled with BamHI and SbfI linearized pUA139 using the NEBuilder  
296 HiFi DNA Assembly kit (New England Biolabs Inc., MA, USA) to generate pTE24G.  
297 Sequence verified plasmid was then used for transformation into strains. Primers used  
298 for amplification and sequencing are described in Table S3.

299 *Media and growth conditions:* Strains were grown in either minimal medium (MM)  
300 containing 'W' salts (10.5 g/l K<sub>2</sub>HPO<sub>4</sub>, 4.5 g/l KH<sub>2</sub>PO<sub>4</sub>, and 0.05 g/l MgSO<sub>4</sub> which was  
301 adjusted to pH 7.0) (41) or basal synthetic urine medium (SU) to assess growth,  
302 fluorescence and enzyme activity. The components for SU, SU-5, and SU-10 are listed  
303 in Table 2; the buffer was MES (50 mM) and the total mixture was adjusted to pH 6.0.  
304 Both media types contained 10 mM of a carbon source, which was glucose, unless  
305 otherwise indicated. MM was supplemented with 0.15% (w/v) nitrogen source ((NH<sub>4</sub>)<sub>2</sub>SO<sub>4</sub>  
306 – nitrogen-rich or alanine – nitrogen-deficient). Commercial amino acid mixtures (tryptone  
307 or casamino acids), where indicated, were added at a concentration of 0.02% (w/v). To  
308 assess growth, starter cultures (12- to 14-hour incubation) from a single colony were  
309 grown either in MM-ammonia or SU. Starter cultures for the  $\Delta glnA$ ,  $\Delta crp$  and  $\Delta glnG\Delta crp$   
310 strains were supplemented with 5 mM glutamine. Cells were pelleted, washed with  
311 phosphate-buffer-saline (pH 7.4), resuspended in no-carbohydrate MM or SU and diluted  
312 to an OD<sub>600</sub> of 0.2. Washed cells were inoculated at a ratio of 1:200 in a culture volume  
313 of 200  $\mu$ l per well of a 96-well microtiter plate. Growth was assayed by measuring OD<sub>600</sub>  
314 at intervals of 30 minutes for 48–72 hours on plate readers (Biotek Instruments Inc., VT,  
315 USA). Cultures were incubated at 37°C and at 237 cpm. For strains carrying the pUA139  
316 plasmid or its derivatives, fluorescence was measured concurrently with growth at an

317 excitation wavelength of 485 nm and emission recorded at 540 nm (42). IPTG at a final  
318 concentration of 0.2 mM was added to cultures carrying the pCA-*glnA* plasmid to control  
319 *glnA* expression. Strains carrying the empty pCA24N vector were used as controls to  
320 assess the effect of *glnA* expression during growth in the deletion mutants. Antibiotics,  
321 where necessary, were added at the following concentrations, kanamycin 25 µg/ml and  
322 chloramphenicol 7.5 µg/ml.

323 *Growth kinetics and relative fluorescence calculations:* Data from each growth run were  
324 exported from the Gen5 software (Biotek Instruments Inc., VT, USA) into Microsoft excel  
325 and OD<sub>600</sub> reads corrected for pathlength. Data from independent experiments were used  
326 to plot growth curves using GraphPad Prism (Ver. 9.2.1, GraphPad Software Inc., CA,  
327 USA). Specific growth rate ( $\mu$ ) of each culture was calculated using the formula,  $\mu =$   
328  $\ln(\text{OD}_{t2}/\text{OD}_{t1})/(t2-t1)$ , where OD<sub>t2</sub> and OD<sub>t1</sub> are OD<sub>600</sub> during the exponential growth phase  
329 at time t2 and t1 respectively. Doubling time is calculated as,  $\text{DT} = \ln(2)/\mu$ . All time  
330 measurements are in hours. Final cell densities were determined as colony forming units  
331 (CFU) per milliliter. At the end of each growth assay, cultures were diluted and 20 µl  
332 spotted on Luria-Bertani (LB – 10 g tryptone, 10 g NaCl, 5 g yeast extract, pH 7.0) agar  
333 plates and incubated at 37°C for 16–18 hours before counting colonies for CFU  
334 calculations. For the fluorescence measurements, fluorescence reads from strains with  
335 an empty pUA139 vector (plasmid with no promoter region or truncated gene fused to  
336 GFP) were subtracted from the reads of strains carrying the *pglnAp-gfp*, *pnacp-gfp* and  
337 pTE*glnA* plasmids, under similar growth conditions, to correct for the background  
338 fluorescence signal at each time point. The corrected reads were used for calculating  
339 relative fluorescence, which is determined as the ratio of the rate of change of

340 fluorescence to the rate of change of absorbance ( $OD_{600}$ ) during the exponential growth  
341 phase. All graphs were generated, and analyses performed using GraphPad Prism (Ver.  
342 9.2.1, GraphPad Software Inc., CA, USA).

343 *Enzyme activity:* Cells were harvested in the exponential phase during growth in microtiter  
344 plates by the addition of cetyltrimethylammonium bromide (CTAB) and  $MnCl_2$  to a final  
345 concentration of 100  $\mu g/ml$  and 1 mM respectively, followed by shaking for 15 minutes.  
346 Cells were pelleted, resuspended in cold 2.5 mg/ml CTAB, pelleted again, resuspended  
347 in buffer (pH 7.27) containing 20 mM imidazole, 100  $\mu g/ml$  CTAB and 0.3 mM  $MnCl_2$ ,  
348 stored on ice and used for the enzyme assays. Glutamine synthetase activity of cultures  
349 was determined by using 25-100  $\mu l$  of the prepared cell suspension in a reaction mixture  
350 (pH 7.27) containing 135 mM imidazole, 80  $\mu g/ml$  CTAB, 25 mM potassium arsenate, 20  
351 mM hydroxylamine, 0.4 mM ADP, and 0.2 mM  $MnCl_2$ . Glutamine at a final concentration  
352 of 20 mM was added to the reaction mixture incubated at 37°C. The reaction was stopped  
353 by adding 1 ml of a stop mix containing 0.2 M  $FeCl_3$ , 0.12 M trichloroacetic acid and 0.25  
354 N HCl. Cell debris were removed by centrifugation and the absorbance measured at 540  
355 nm. Protein estimation was done by the Lowry method (43). Final enzyme activities are  
356 recorded as nanomoles of product formed per minute per milligram of protein. All graphs  
357 were generated, and analyses performed using GraphPad Prism (Ver. 9.2.1, GraphPad  
358 Software Inc., CA, USA).

### 359 **Acknowledgements**

360 This work was supported by a UT Dallas Collaborative Biomedical Research Award grant  
361 program, but not by specific grants from any funding agency in the public, commercial, or  
362 not-for-profit sectors. The authors have no relevant affiliations or financial involvement



363 with any organization or entity with a financial interest in or financial conflict with the  
364 subject matter or materials discussed.

## 365 **References**

- 366 1. Ejrnaes K. 2011. Bacterial characteristics of importance for recurrent urinary tract  
367 infections caused by *Escherichia coli*. *Dan Med Bull* 58:B4187.
- 368 2. Foxman B. 2010. The epidemiology of urinary tract infection. *Nat Rev Urol* 7:653-  
369 660.
- 370 3. Rowe TA, Juthani-Mehta M. 2013. Urinary tract infection in older adults. *Aging*  
371 *health*. 9:doi:10.2217/ahe.13.38.
- 372 4. Flores-Mireles AL, Walker JN, Caparon M, Hultgren SJ. 2015. Urinary tract  
373 infections: epidemiology, mechanisms of infection and treatment options. *Nat Rev*  
374 *Microbiol* 13:269-284.
- 375 5. Forsyth VS, Armbruster CE, Smith SN, Pirani A, Springman AC, Walters MS,  
376 Nielubowicz GR, Himpel SD, Snitkin ES, Mobley HLT. 2018. Rapid growth of  
377 uropathogenic *Escherichia coli* during human urinary tract infection. *MBio*.  
378 9:doi:10.1128/mBio.00186-18.
- 379 6. Sintsova A, Frick-Cheng AE, Smith S, Pirani A, Subashchandrabose S, Snitkin ES,  
380 Mobley H. 2019. Genetically diverse uropathogenic *Escherichia coli* adopt a  
381 common transcriptional program in patients with UTIs. *Elife*.  
382 8:doi:10.7554/eLife.49748.
- 383 7. Glover M, Moreira CG, Sperandio V, Zimmern P. 2014. Recurrent urinary tract  
384 infections in healthy and nonpregnant women. *Urol Sci* 25:1-8.

- 385 8. Selekman RE, Shapiro DJ, Boscardin J, Williams G, Craig JC, Brandström P,  
386 Pennesi M, Roussey-Kesler G, Hari P, Copp HL. 2018. Uropathogen resistance  
387 and antibiotic prophylaxis: a meta-analysis. *Pediatrics*.  
388 142:doi:10.1542/peds.2018-0119.
- 389 9. Anonymous. 2021. Global antimicrobial resistance and use surveillance system  
390 (GLASS) report: 2021. World Health Organization, Geneva.  
391 <https://apps.who.int/iris/handle/10665/341666>.
- 392 10. Malik RD, Wu YR, Christie AL, Alhalabi F, Zimmern PE. 2018. Impact of allergy  
393 and resistance on antibiotic selection for recurrent urinary tract infections in older  
394 women. *Urology* 113:26-33.
- 395 11. Snyder JA, Haugen BJ, Buckles EL, Lockett CV, Johnson DE, Donnenberg MS,  
396 Welch RA, Mobley HL. 2004. Transcriptome of uropathogenic *Escherichia coli*  
397 during urinary tract infection. *Infect Immun* 72:6373-6381.
- 398 12. Hagan EC, Lloyd AL, Rasko DA, Faerber GJ, Mobley HL. 2010. *Escherichia coli*  
399 global gene expression in urine from women with urinary tract infection. *PLoS*  
400 *Pathog* 6:e1001187.
- 401 13. Reitzer L, Zimmern P. 2020. Rapid growth and metabolism of uropathogenic  
402 *Escherichia coli* in relation to urine composition. *Clin Microbiol Rev* 33:e00101-  
403 00119.
- 404 14. Reitzer L. 2003. Nitrogen assimilation and global regulation in *Escherichia coli*.  
405 *Annu Rev Microbiol* 57:155-176.

- 406 15. Matthews DM, Payne JW. 1980. Transmembrane transport of small peptides, p  
407 331-425. *In* Bronner F, Kleinzeller A (ed), Current Topics in Membranes and  
408 Transport, vol 14. Academic Press.
- 409 16. Karp PD, Ong WK, Paley S, Billington R, Caspi R, Fulcher C, Kothari A,  
410 Krummenacker M, Latendresse M, Midford PE, Subhraveti P, Gama-Castro S,  
411 Muniz-Rascado L, Bonavides-Martinez C, Santos-Zavaleta A, Mackie A, Collado-  
412 Vides J, Keseler IM, Paulsen I. 2018. The EcoCyc Database. EcoSal Plus.  
413 8:doi:10.1128/ecosalplus.ESP-0006-2018.
- 414 17. Reitzer LJ, Magasanik B. 1985. Expression of *glnA* in *Escherichia coli* is regulated  
415 at tandem promoters. *Proc Natl Acad Sci U S A* 82:1979-1983.
- 416 18. Sanzey B, Ullmann A. 1976. Urea, a specific inhibitor of catabolite sensitive  
417 operons. *Biochem Biophys Res Commun* 71:1062-1068.
- 418 19. Sanzey B, Ullmann A. 1980. The effect of urea on catabolite sensitive operons in  
419 *Escherichia coli* K 12. *Mol Gen Genet* 178:611-616.
- 420 20. Claverie-Martin F, Magasanik B. 1992. Positive and negative effects of DNA  
421 bending on activation of transcription from a distant site. *J Mol Biol* 227:996-1008.
- 422 21. Hunt TP, Magasanik B. 1985. Transcription of *glnA* by purified *Escherichia coli*  
423 components: core RNA polymerase and the products of *glnF*, *glnG*, and *glnL*. *Proc*  
424 *Natl Acad Sci U S A* 82:8453-8457.
- 425 22. Tian ZX, Li QS, Buck M, Kolb A, Wang YP. 2001. The CRP-cAMP complex and  
426 downregulation of the *glnAp2* promoter provides a novel regulatory linkage  
427 between carbon metabolism and nitrogen assimilation in *Escherichia coli*. *Mol*  
428 *Microbiol* 41:911-924.

- 429 23. Donovan GT, Norton JP, Bower JM, Mulvey MA. 2013. Adenylate cyclase and the  
430 cyclic AMP receptor protein modulate stress resistance and virulence capacity of  
431 uropathogenic *Escherichia coli*. *Infect Immun* 81:249-258.
- 432 24. Yang B, Bankir L. 2005. Urea and urine concentrating ability: new insights from  
433 studies in mice. *Am J Physiol Renal Physiol* 288:F881-896.
- 434 25. Woolfolk CA, Stadtman ER. 1967. Regulation of glutamine synthetase: III.  
435 Cumulative feedback inhibition of glutamine synthetase from *Escherichia coli*.  
436 *Archives of Biochemistry and Biophysics* 118:736-755.
- 437 26. Kingdon HS, Stadtman ER. 1967. Regulation of glutamine synthetase. X. Effect of  
438 growth conditions on the susceptibility of *Escherichia coli* glutamine synthetase to  
439 feedback inhibition. *J Bacteriol* 94:949-957.
- 440 27. Liaw SH, Pan C, Eisenberg D. 1993. Feedback inhibition of fully unadenylylated  
441 glutamine synthetase from *Salmonella typhimurium* by glycine, alanine, and  
442 serine. *Proc Natl Acad Sci U S A* 90:4996-5000.
- 443 28. Bennett BD, Kimball EH, Gao M, Osterhout R, Van Dien SJ, Rabinowitz JD. 2009.  
444 Absolute metabolite concentrations and implied enzyme active site occupancy in  
445 *Escherichia coli*. *Nat Chem Biol* 5:593-599.
- 446 29. Ikeda TP, Shauger AE, Kustu S. 1996. *Salmonella typhimurium* apparently  
447 perceives external nitrogen limitation as internal glutamine limitation. *J Mol Biol*  
448 259:589-607.
- 449 30. Calvo JM, Matthews RG. 1994. The leucine-responsive regulatory protein, a global  
450 regulator of metabolism in *Escherichia coli*. *Microbiol Rev* 58:466-490.

- 451 31. Hogins J, Fan E, Seyan Z, Kusin S, Christie AL, Zimmern PE, Reitzer L. 2022.  
452 Bacterial growth of uropathogenic *Escherichia coli* in pooled urine is much higher  
453 than predicted from the average growth in individual urine samples. *Microbiol*  
454 *Spectr.* e0201622. doi:10.1128/spectrum.02016-22.
- 455 32. Reitzer L. 2005. Catabolism of amino acids and related compounds. *EcoSal Plus.*  
456 1:doi:10.1128/ecosalplus.3.4.7.
- 457 33. Loddeke M, Schneider B, Oguri T, Mehta I, Xuan Z, Reitzer L. 2017. Anaerobic  
458 cysteine degradation and potential metabolic coordination in *Salmonella enterica*  
459 and *Escherichia coli*. *J Bacteriol* 199:e00117-00117.
- 460 34. Moriguchi J, Ezaki T, Tsukahara T, Fukui Y, Ukai H, Okamoto S, Shimbo S,  
461 Sakurai H, Ikeda M. 2005. Decreases in urine specific gravity and urinary  
462 creatinine in elderly women. *Int Arch Occup Environ Health* 78:438-445.
- 463 35. Baba T, Ara T, Hasegawa M, Takai Y, Okumura Y, Baba M, Datsenko KA, Tomita  
464 M, Wanner BL, Mori H. 2006. Construction of *Escherichia coli* K-12 in-frame,  
465 single-gene knockout mutants: the Keio collection. *Mol Syst Biol* 2:2006 0008.
- 466 36. Reitzer LJ, Magasanik B. 1986. Transcription of *glnA* in *E. coli* is stimulated by  
467 activator bound to sites far from the promoter. *Cell* 45:785-792.
- 468 37. Miller JH. 1972. *Experiments in Molecular Genetics*. Cold Spring Harbor  
469 Laboratory, Cold Spring Harbor, NY.
- 470 38. Datsenko KA, Wanner BL. 2000. One-step inactivation of chromosomal genes in  
471 *Escherichia coli* K-12 using PCR products. *Proc Natl Acad Sci U S A* 97:6640-  
472 6645.

- 473 39. Zaslaver A, Bren A, Ronen M, Itzkovitz S, Kikoin I, Shavit S, Liebermeister W,  
474 Surette MG, Alon U. 2006. A comprehensive library of fluorescent transcriptional  
475 reporters for *Escherichia coli*. *Nat Methods* 3:623-628.
- 476 40. Kitagawa M, Ara T, Arifuzzaman M, Ioka-Nakamichi T, Inamoto E, Toyonaga H,  
477 Mori H. 2005. Complete set of ORF clones of *Escherichia coli* ASKA library (a  
478 complete set of *E. coli* K-12 ORF archive): unique resources for biological  
479 research. *DNA Res* 12:291-299.
- 480 41. Smith GR, Halpern YS, Magasanik B. 1971. Genetic and metabolic control of  
481 enzymes responsible for histidine degradation in *Salmonella typhimurium*. 4-  
482 imidazolone-5-propionate amidohydrolase and N-formimino-L-glutamate  
483 formiminohydrolase. *J Biol Chem* 246:3320-3329.
- 484 42. Cormack BP, Valdivia RH, Falkow S. 1996. FACS-optimized mutants of the green  
485 fluorescent protein (GFP). *Gene* 173:33-38.
- 486 43. Lowry OH, Rosebrough NJ, Farr AL, Randall RJ. 1951. Protein measurement with  
487 the Folin phenol reagent. *J Biol Chem* 193:265-275.
- 488 44. Atkinson MR, Pattaramanon N, Ninfa AJ. 2002. Governor of the *glnAp2* promoter  
489 of *Escherichia coli*. *Mol Microbiol* 46:1247-1257.

490

491

## 492 **Figure Legends**

493 **Figure 1. Overview of regulation of glutamine synthetase activity.** Known factors that  
494 control GS activity and *glnA* expression are shown with black arrows, and factors that are  
495 identified in the present work are shown with blue arrows. First, high intracellular  
496 glutamine — mediated by the glutamine-sensing GlnD (uridylyltransferase/uridylyl-  
497 removing enzyme), and acting via GlnB (the regulatory protein PII), and GlnE  
498 (adenylyltransferase/deadenylylase) — covalently adenylylates and inactivates GS.  
499 Second, low intracellular glutamine — which is sensed by GlnD acting through GlnB, GlnL  
500 (a sensor kinase), and GlnG (a response regulator) — activates expression of *glnA* from  
501 the *glnAp2* promoter and a set of genes, which are collectively called Ntr (nitrogen-  
502 regulated) genes. Third, cyclic-AMP-Crp activates *glnA* expression from the *glnAp1*  
503 promoter. Fourth, urea increases *glnA* expression in ammonia-containing media from the  
504 *glnAp1* promoter, but impairs expression in nitrogen-limited media from the *glnAp2*  
505 promoter. Finally, several amino acids and nucleotides, including many that require  
506 glutamine for their synthesis, bind the glutamate- and nucleotide-binding sites and inhibit  
507 GS activity. In addition to the metabolites shown, glucosamine-6-phosphate, AMP and  
508 CTP inhibit activity. These inhibitory amino acids also affect *glnA* activity. Our results  
509 suggest that with urea *glnA* expression is initiated from the *glnAp1* promoter. Without  
510 urea, inconclusive evidence suggests expression initiated from the *glnAp2* promoter.

511

512 **Figure 2: Growth of UTI89 and W3110 in minimal and basal SU medium.** Growth  
513 curves of (A) UTI89 and (B) W3110 strains in the indicated media. The parental strains  
514 showed growth comparable in both media, while the  $\Delta glnA$  mutants failed to grow. The

515 curves are averages of three independent experiments and the error bars represent the  
516 standard deviations. Doubling times are provided in supplemental tables.

517

518 **Figure 3: Growth of UTI89 and W3110 in SU supplemented with amino acids.** Growth  
519 of **(A)** UTI89 and **(B)** W3110 in the indicated media. UTI89 was less sensitive to inhibitory  
520 amino acids compared to W3110 (green curves), and UTI89  $\Delta glnA$  showed marginal  
521 growth in SU-10 medium. The curves are averages of three independent experiments  
522 and the error bars represent the standard deviations. Doubling times are provided in  
523 supplemental tables.

524

525 **Figure 4: Glutamate or amino acid mixtures alleviated amino acid-induced growth**  
526 **inhibition in SU-5 medium or SU medium with the alanyl-leucine dipeptide. (A)**  
527 **Growth of WT UTI89 in SU-5 medium; (B) Growth of WT W3110 in SU-5 medium; and**  
528 **(C) Growth of WT UTI89 in SU-AL medium.** W3110 did not grow in SU-AL medium. The  
529 curves are averages of three independent experiments and the error bars represent the  
530 standard deviations.

531

532 **Figure 5: Effect of amino acids and urea on *glnA* and *nac* expression.** *glnA*  
533 expression in the indicated media for **(A)** WT UTI89 and **(B)** WT W3110 – *glnA* expression  
534 in SU is comparable to expression levels in MM-alanine. Growth in SU-5 or SU-AL  
535 induces higher *glnA* expression for UTI89. *glnA* expression in nitrogen-limited (MM-  
536 alanine) and nitrogen-excess (MM-NH<sub>4</sub><sup>+</sup>) minimal media with and without urea for **(C)**



537 UTI89 and **(D)** W3110 – Urea induces *glnA* expression in MM-NH<sub>4</sub><sup>+</sup> but represses  
538 expression in MM-alanine. *nac* expression in the indicated media for **(E)** WT UTI89 and  
539 **(F)** WT W3110 – *nac* is not expressed during growth in SU in both strains. All curves  
540 represent average expression from three independent experiments measured  
541 concurrently with growth in respective media and error bars represent standard  
542 deviations.

543

544 **Figure 6: Relative transcriptional expression of *glnA* in different media.** *glnA*  
545 expression in **(A)** WT UTI89 and **(B)** WT W3110. Because W3110 did not grow in SU-5  
546 or SU-AL, there is no expression data. Significance was calculated using one-way  
547 ANOVA along with Dunnett's multiple comparisons test; \*  $p \leq 0.05$ ; \*\*  $p \leq 0.01$ ; \*\*\*  $p \leq$   
548  $0.001$ ; \*\*\*\*  $p \leq 0.0001$ . The data are averages of three independent experiments and  
549 the error bars represent the standard deviations.

550

551 **Figure 7: Relative transcriptional expression of *glnA* was altered by urea and the**  
552 **abundant urinary amino acids.** **(A)** WT UTI89 and **(B)** WT W3110. NG means no  
553 growth. Significance was calculated using one-way ANOVA along with Dunnett's multiple  
554 comparisons test; \*  $p \leq 0.05$ ; \*\*  $p \leq 0.01$ ; \*\*\*  $p \leq 0.001$ ; \*\*\*\*  $p \leq 0.0001$ . The data are  
555 averages of three independent experiments and the error bars represent the standard  
556 deviations.

557

558 **Figure 8: The *glnA* regulatory region.** The binding sites are drawn to scale. GlnG sites  
559 1 and 2 are strong sites required for activation from the *glnAp2* promoter, while sites 3-5  
560 (shaded) appear to modulate activated expression (44). Crp-binding site(s) have not been  
561 experimentally determined for the *glnA* regulatory region. EcoCyc describes a Crp binding  
562 site from -133 to -120 which is between the strong GlnG binding sites and the RNA  
563 polymerase binding site (16).

564

565 **Figure 9: Growth phenotypes of  $\Delta glnG$ ,  $\Delta crp$  and  $\Delta glnG\Delta crp$  mutants in SU**  
566 **medium.** Growth of **(A)** UTI89 mutants and **(B)** W3110 mutants in SU medium. Growth  
567 is defective for  $\Delta crp$  strains but not for  $\Delta glnG$  strains. Overexpression of *glnA* in the  $\Delta crp$   
568 mutants restored growth back to WT levels in both strains. The curves are averages of  
569 three independent experiments and the error bars represent the standard deviations.  
570 Doubling times are provided in supplemental tables.

571

572 **Figure 10: Glutamine synthetase activity during growth in various media.** GS activity  
573 in **(A)** WT UTI89 and **(B)** WT W3110. NG means no growth. GS activity was not  
574 detectable in urea-containing media even though *glnA* was transcribed (see Figs. 5 and  
575 6). Significance was calculated using one-way ANOVA along with Dunnett's multiple  
576 comparisons test; \*\*\*\*  $p \leq 0.0001$ . The data are averages of three independent  
577 experiments and the error bars represent the standard deviations.

578

579 **Figure 11: Translational expression of *glnA*.** Expression during growth is shown for  
580 **(A)** WT UTI89 and **(B)** WT W3110 and quantified for **(C)** UTI89 and **(D)** W3110. NG  
581 means no growth. *glnA* mRNA was not translated during growth in urea-containing media  
582 even though *glnA* was transcribed (see Fig. 5). Significance was calculated using one-  
583 way ANOVA along with Dunnett's multiple comparisons test; \*  $p \leq 0.05$ ; \*\*  $p \leq 0.01$ ; \*\*\*\*  
584  $p \leq 0.0001$ . The data are averages of three independent experiments and the error bars  
585 represent the standard deviations.

586

587

**Table 1: Strains and plasmids**

| <b>Strain or Plasmid</b> | <b>Relevant genotype or description</b>                                                          | <b>Source or Reference</b> |
|--------------------------|--------------------------------------------------------------------------------------------------|----------------------------|
| <b>Strains</b>           |                                                                                                  |                            |
| UTI89 (wild type)        |                                                                                                  | Laboratory strain          |
| UKU1                     | UTI89 $\Delta$ <i>glnA</i> ::Tn5, Kan <sup>r</sup>                                               | This study                 |
| UKU2                     | UTI89 $\Delta$ <i>glnG</i> ::Kan <sup>r</sup>                                                    | This study                 |
| UKU3                     | UTI89 $\Delta$ <i>glnG</i> :: $\Delta$ Kan <sup>r</sup> , $\Delta$ <i>crp</i> ::Kan <sup>r</sup> | This study                 |
| UKU4                     | UTI89 $\Delta$ <i>crp</i> ::Kan <sup>r</sup>                                                     | This study                 |
| UKU5                     | UTI89(pUA139)                                                                                    | This study                 |
| UKU6                     | UTI89( <i>pglnAp-gfp</i> )                                                                       | This study                 |
| UKU7                     | UTI89( <i>pnacp-gfp</i> )                                                                        | This study                 |
| UKU8                     | UTI89(pTE <i>glnA</i> )                                                                          | This study                 |
| UKU9                     | UKU1(pCA24N)                                                                                     | This study                 |
| UKU10                    | UKU1(pCA- <i>glnA</i> )                                                                          | This study                 |
| UKU11                    | UKU3(pCA24N)                                                                                     | This study                 |
| UKU12                    | UKU3(pCA- <i>glnA</i> )                                                                          | This study                 |
| UKU13                    | UKU4(pCA24N)                                                                                     | This study                 |
| UKU14                    | UKU4(pCA- <i>glnA</i> )                                                                          | This study                 |
| W3110 (wild type)        | <i>lacL8 lacI<sup>q</sup></i>                                                                    | Laboratory strain          |
| WKU1                     | W3110 $\Delta$ <i>glnA</i> ::Tn5, Kan <sup>r</sup>                                               | This study                 |
| WKU2                     | W3110 $\Delta$ <i>glnG</i> ::Kan <sup>r</sup>                                                    | This study                 |

|       |                                                                                                  |            |
|-------|--------------------------------------------------------------------------------------------------|------------|
| WKU3  | W3110 $\Delta$ <i>glnG</i> :: $\Delta$ Kan <sup>r</sup> , $\Delta$ <i>crp</i> ::Kan <sup>r</sup> | This study |
| WKU4  | W3110 $\Delta$ <i>crp</i> ::Kan <sup>r</sup>                                                     | This study |
| WKU5  | W3110(pUA139)                                                                                    | This study |
| WKU6  | W3110(p <i>glnAp-gfp</i> )                                                                       | This study |
| WKU7  | W3110(p <i>pnacp-gfp</i> )                                                                       | This study |
| WKU8  | W3110(pTE <i>glnA</i> )                                                                          | This study |
| WKU9  | WKU1(pCA24N)                                                                                     | This study |
| WKU10 | WKU1(pCA- <i>glnA</i> )                                                                          | This study |
| WKU11 | WKU3(pCA24N)                                                                                     | This study |
| WKU12 | WKU3(pCA- <i>glnA</i> )                                                                          | This study |
| WKU13 | WKU4(pCA24N)                                                                                     | This study |
| WKU14 | WKU4(pCA- <i>glnA</i> )                                                                          | This study |

### ***Plasmids***

|                   |                                                                                                                            |      |
|-------------------|----------------------------------------------------------------------------------------------------------------------------|------|
| pCP20             | Cam <sup>r</sup> , Amp <sup>r</sup> , FLP recombinase                                                                      | (35) |
| -----             |                                                                                                                            |      |
| pUA139            | Kan <sup>r</sup> p15A <i>ori</i> ; <i>gfp</i> transcriptional fusion<br>template (No promoter fusion)                      | (36) |
| -----             |                                                                                                                            |      |
|                   | pUA139 $\Omega$ [BamHI-XhoI::K-12<br>complement(4,057,963 – 4,058,454) 492                                                 |      |
| <i>pglnAp-gfp</i> | bp] transcriptionally fused to <i>gfp</i><br>492 bp insertion is 420 bp upstream<br>fragment and 72 bp of <i>glnA</i> gene | (36) |
| -----             |                                                                                                                            |      |

---

|                  |                                                                                                                                                                                                                                                          |            |
|------------------|----------------------------------------------------------------------------------------------------------------------------------------------------------------------------------------------------------------------------------------------------------|------------|
|                  | pUA139 $\Omega$ [BamHI-XhoI::K-12<br>complement(2,061,841 – 2,062,288) 448<br>bp] transcriptionally fused to <i>gfp</i><br>448 bp insertion is 355 bp upstream<br>fragment and 93 bp of <i>nac</i> gene                                                  | (36)       |
| pTE <i>glnA</i>  | pUA139 $\Delta$ (499-530) $\Omega$ [6-531::K-12<br>complement(4,057,963 – 4,058,454) 492<br>bp] translationally fused to <i>gfp</i><br>492 bp insertion is 420 bp fragment<br>upstream of <i>glnA</i> and first 72 bp (24 amino<br>acids) of <i>glnA</i> | This study |
| pCA24N           | Cam <sup>r</sup> <i>lacI<sup>q</sup></i> P <sub>T5-lac</sub> ::His <sub>6</sub> (empty ASKA)                                                                                                                                                             | (37)       |
| pCA- <i>glnA</i> | Cam <sup>r</sup> <i>lacI<sup>q</sup></i> P <sub>T5-lac</sub> ::His <sub>6</sub> - <i>glnA</i> <sup>+</sup>                                                                                                                                               | (37)       |

---

588

589

590

**Table 2: Synthetic urine media components**

| <b>Component</b>                                | <b>Concentration in SU<br/>(synthetic urine)</b> | <b>SU-5</b> | <b>SU-10</b> |
|-------------------------------------------------|--------------------------------------------------|-------------|--------------|
| Urea                                            | 250 mM                                           | as SU       | as SU        |
| NaCl                                            | 100 mM                                           | as SU       | as SU        |
| KCl                                             | 40 mM                                            | as SU       | as SU        |
| Na <sub>2</sub> HPO <sub>4</sub>                | 10 mM                                            | as SU       | as SU        |
| (NH <sub>4</sub> ) <sub>2</sub> SO <sub>4</sub> | 10 mM                                            | as SU       | as SU        |
| MgCl <sub>2</sub>                               | 3 mM                                             | as SU       | as SU        |
| CaCl <sub>2</sub>                               | 3 mM                                             | as SU       | as SU        |
| FeSO <sub>4</sub>                               | 0.005 mM                                         | as SU       | as SU        |
| Glycine                                         |                                                  | 2.1 mM      | as SU-5      |
| Histidine                                       |                                                  | 1.2 mM      | as SU-5      |
| Cysteine                                        |                                                  | 0.6 mM      | as SU-5      |
| Serine                                          |                                                  | 0.5 mM      | as SU-5      |
| Alanine                                         |                                                  | 0.5 mM      | as SU-5      |
| Leucine                                         |                                                  |             | 0.4 mM       |
| Aspartate                                       |                                                  |             | 0.2 mM       |
| Threonine                                       |                                                  |             | 0.2 mM       |
| Methionine                                      |                                                  |             | 0.1 mM       |
| Glutamate                                       |                                                  |             | 0.1 mM       |

591

## FIG 1

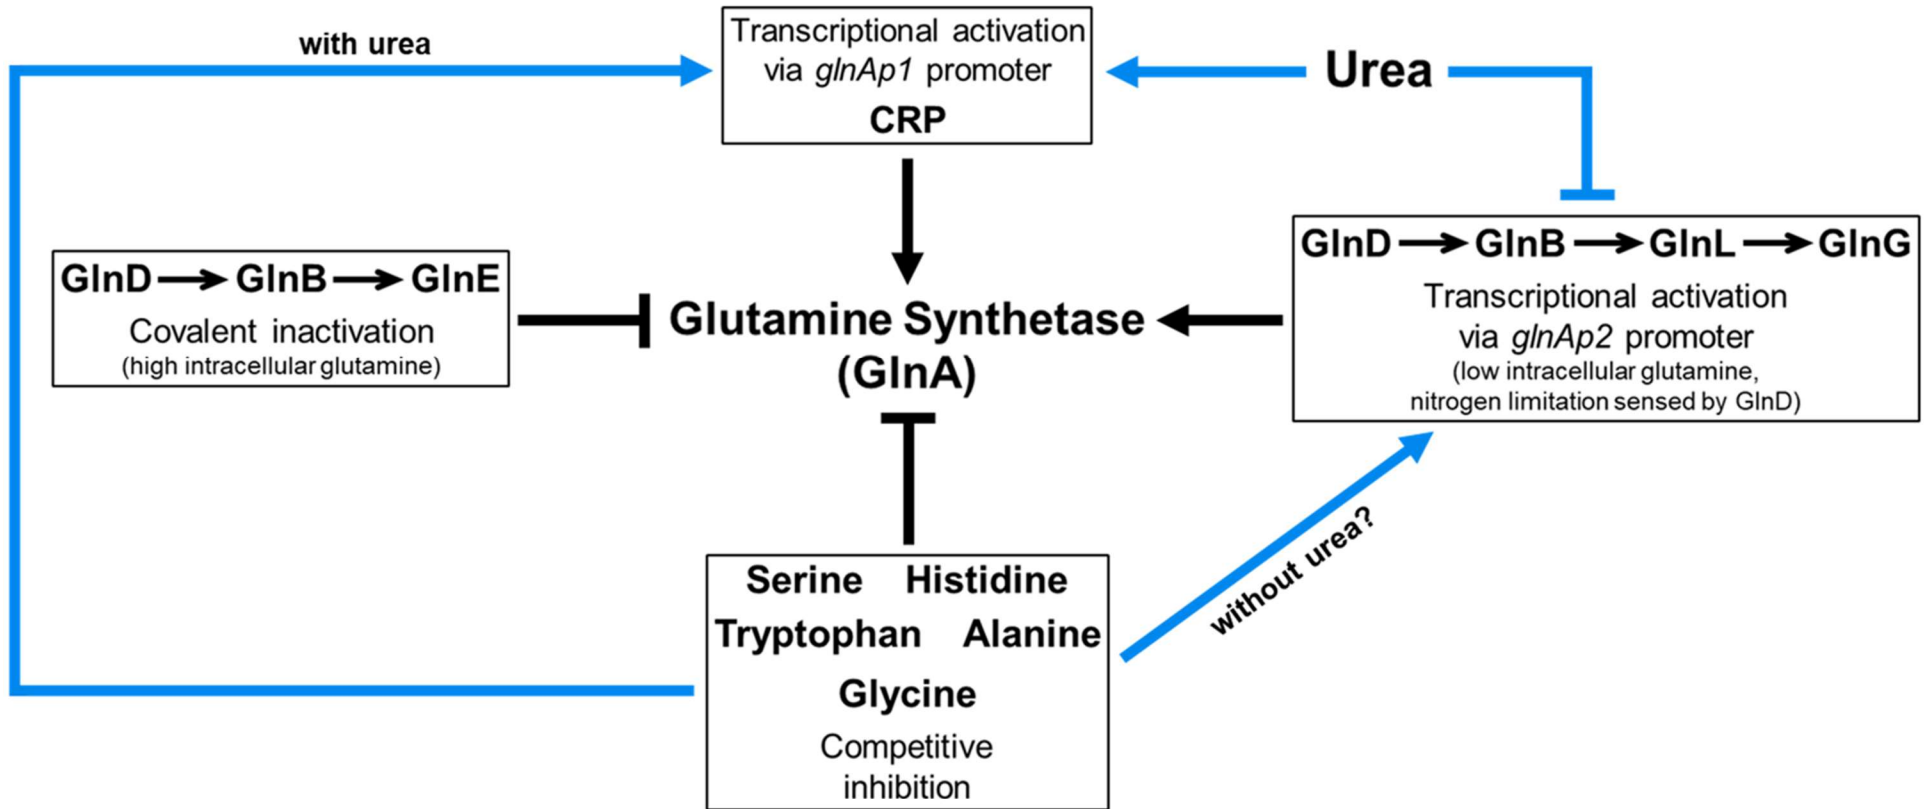

**Figure 1. Overview of regulation of glutamine synthetase activity.** Known factors that control GS activity and *glnA* expression are shown with black arrows, and factors that are identified in the present work are shown with blue arrows. First, high intracellular glutamine — mediated by the glutamine-sensing GlnD (uridylyltransferase/uridylyl-removing enzyme), and acting via GlnB (the regulatory protein PII), and GlnE (adenylyltransferase/deadenylylase) — covalently adenylylates and inactivates GS. Second, low intracellular glutamine — which is sensed by GlnD acting through GlnB, GlnL (a sensor kinase), and GlnG (a response regulator) — activates expression of *glnA* from the *glnAp2* promoter and a set of genes, which are collectively called Ntr (nitrogen-regulated) genes. Third, cyclic-AMP-Crp activates *glnA* expression from the *glnAp1* promoter. Fourth, urea increases *glnA* expression in ammonia-containing media from the *glnAp1* promoter, but impairs expression in nitrogen-limited media from the *glnAp2* promoter. Finally, several amino acids and nucleotides, including many that require glutamine for their synthesis, bind the glutamate- and nucleotide-binding sites and inhibit GS activity. In addition to the metabolites shown, glucosamine-6-phosphate, AMP and CTP inhibit activity. These inhibitory amino acids also affect *glnA* activity. Our results suggest that with urea *glnA* expression is initiated from the *glnAp1* promoter. Without urea, inconclusive evidence suggests expression initiated from the *glnAp2* promoter.



## FIG 2

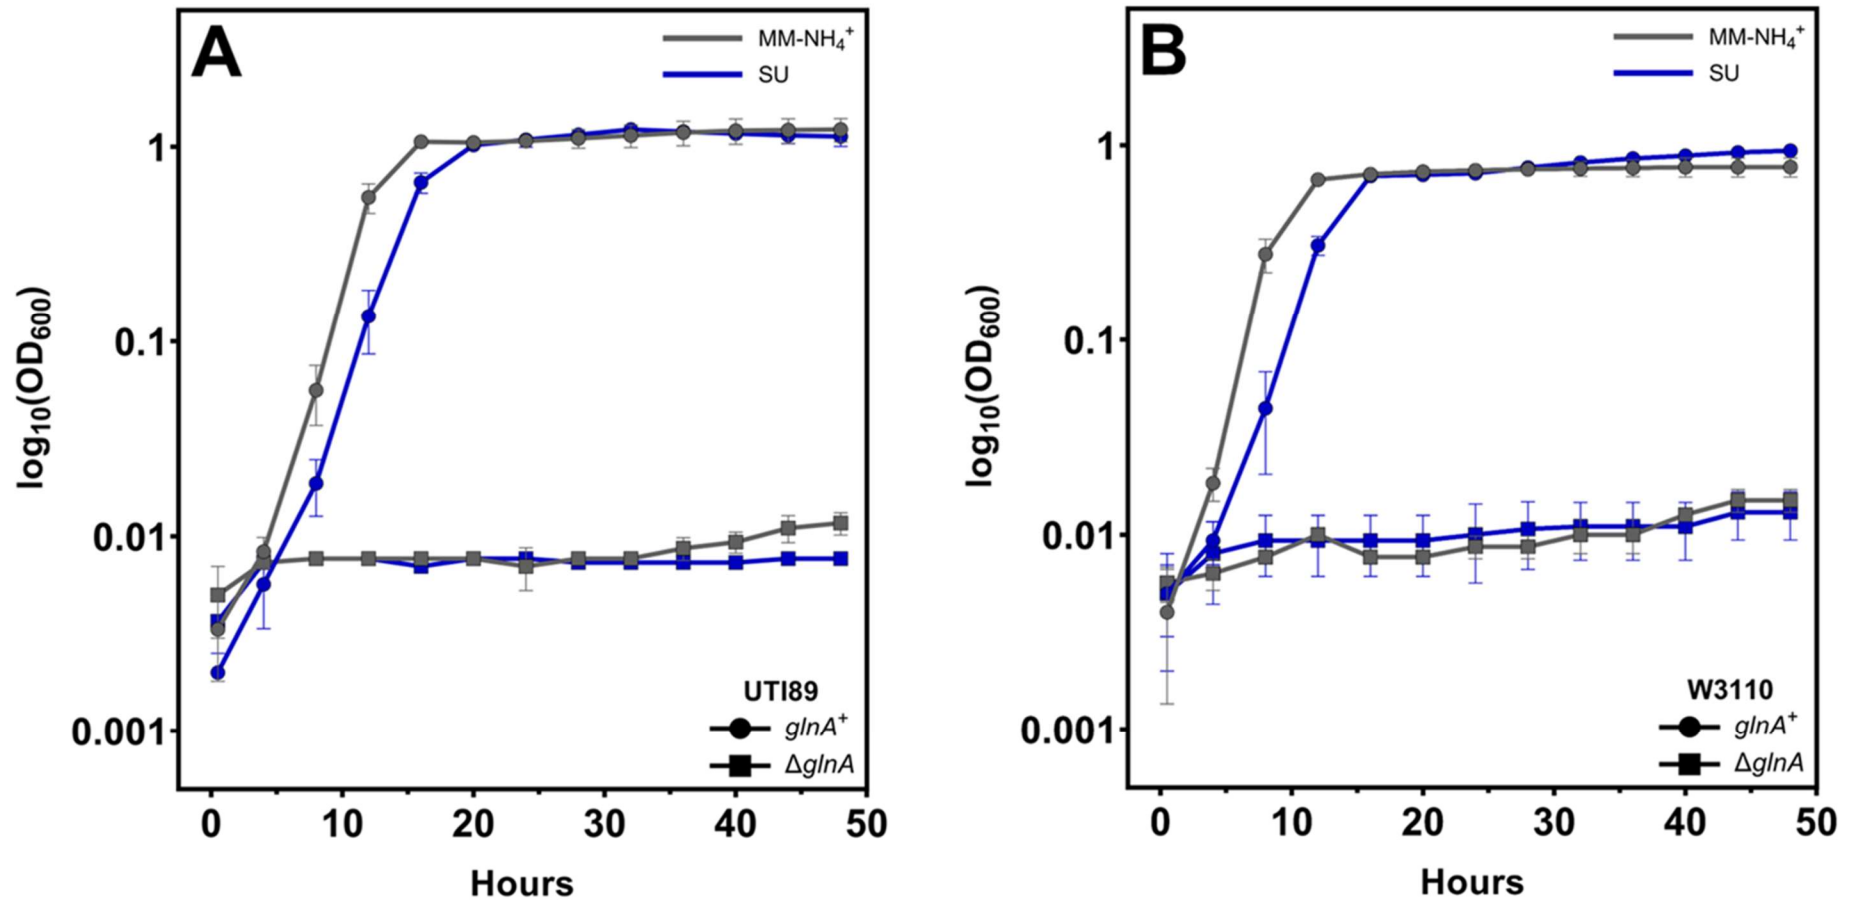

**Figure 2: Growth of UTI89 and W3110 in minimal and basal SU medium.** Growth curves of (A) UTI89 and (B) W3110 strains in the indicated media. The parental strains showed growth comparable in both media, while the  $\Delta glnA$  mutants failed to grow. The curves are averages of three independent experiments and the error bars represent the standard deviations. Doubling times are provided in supplemental tables.

## FIG 3

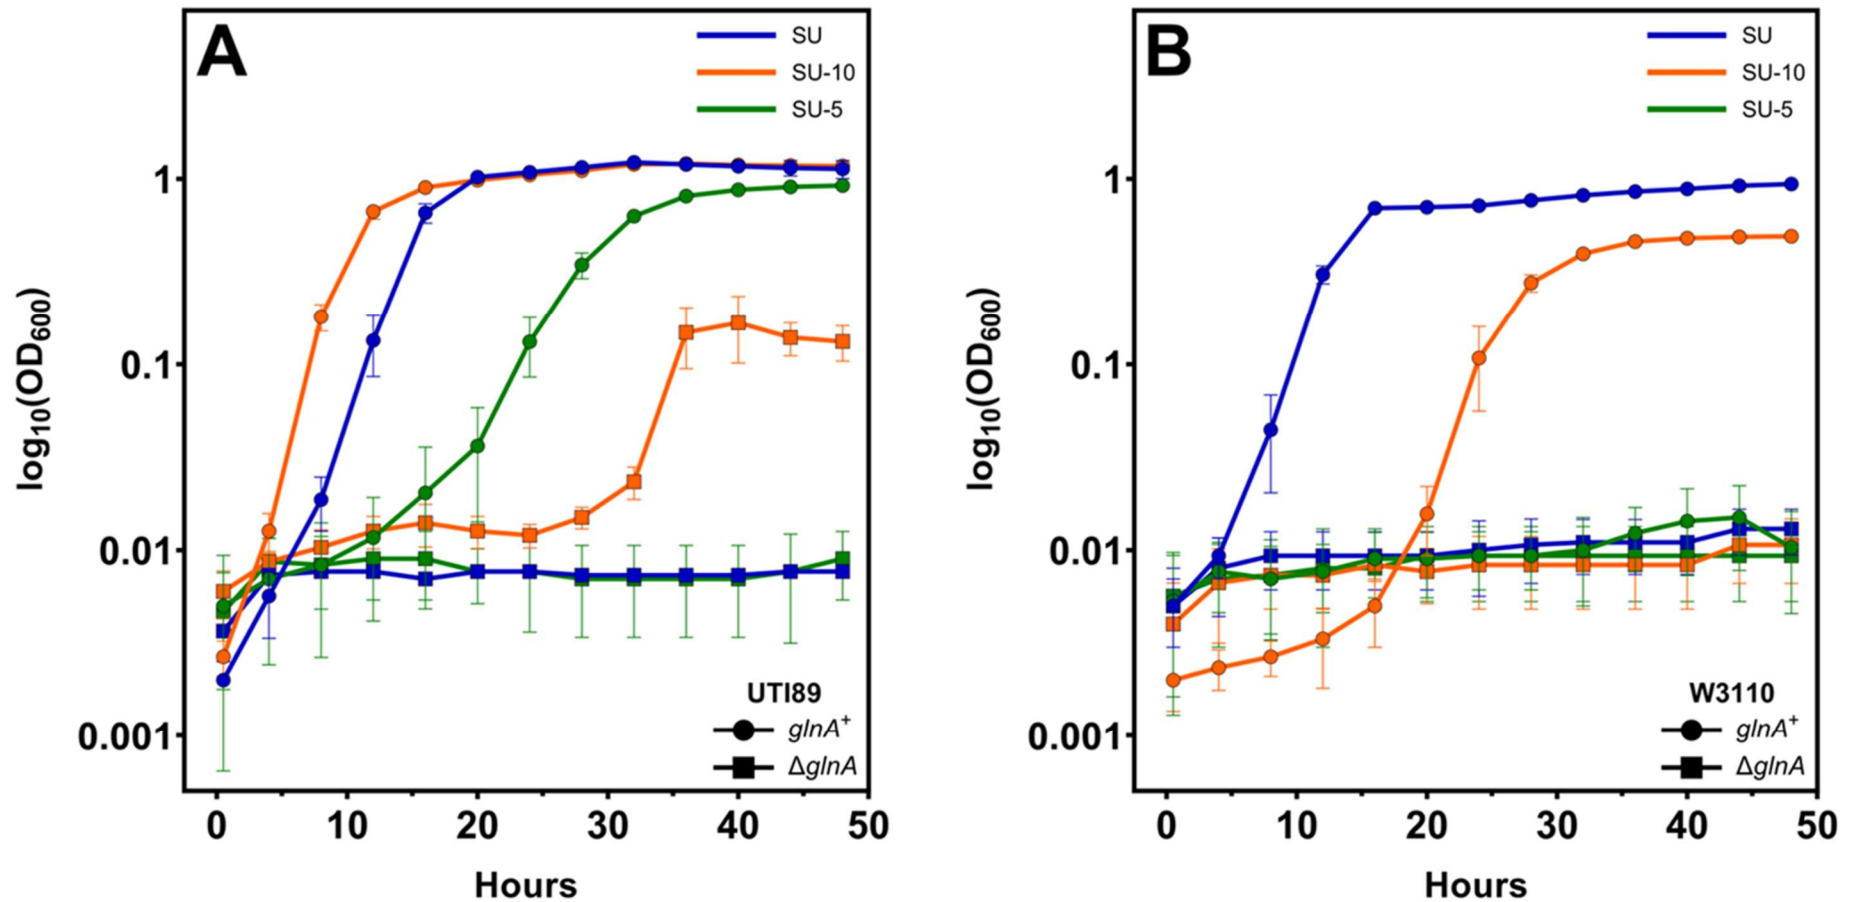

**Figure 3: Growth of UTI89 and W3110 in SU supplemented with amino acids.** Growth of (A) UTI89 and (B) W3110 in the indicated media. UTI89 was less sensitive to inhibitory amino acids compared to W3110 (green curves), and UTI89 $\Delta glnA$  showed marginal growth in SU-10 medium. The curves are averages of three independent experiments and the error bars represent the standard deviations. Doubling times are provided in supplemental tables.

Main Paper Figures

FIG 4

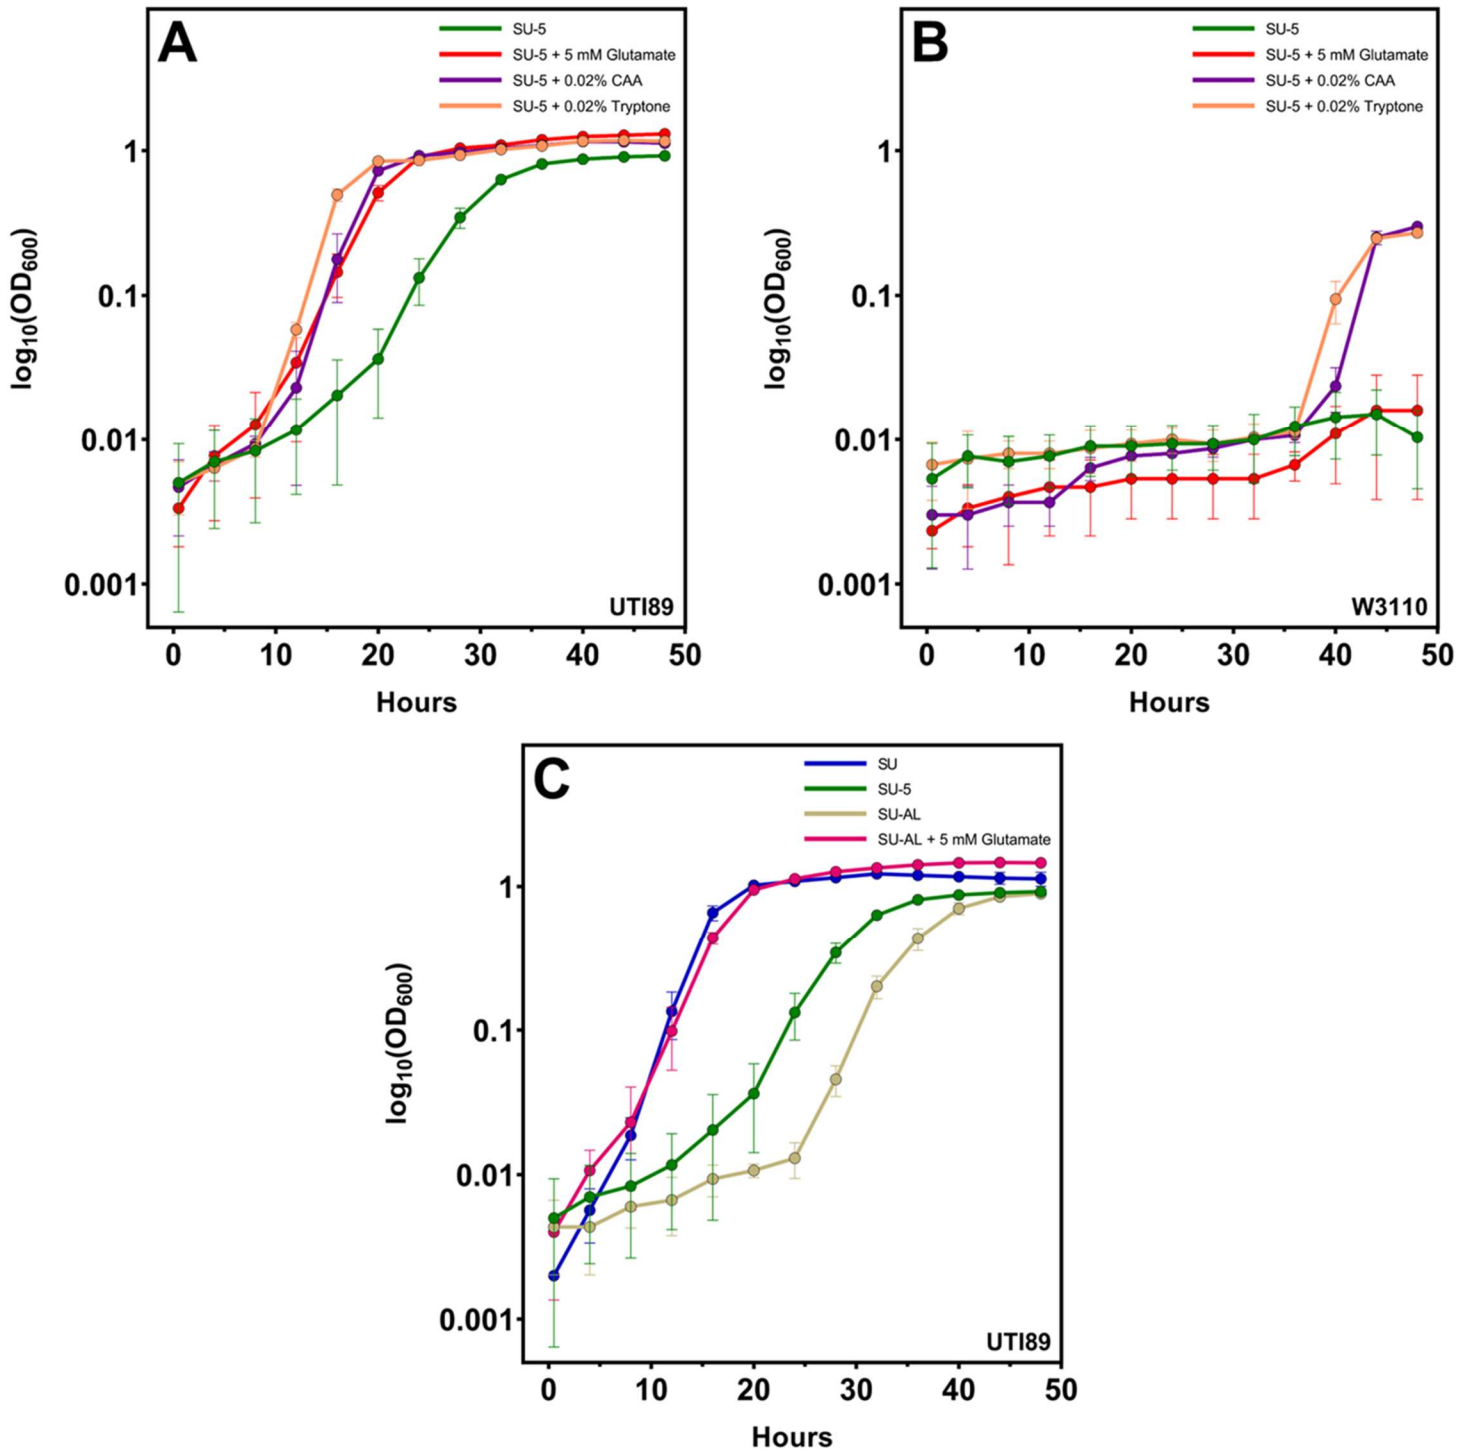

Figure 4: Glutamate or amino acid mixtures alleviated amino acid-induced growth inhibition in SU-5 medium or SU medium with the alanyl-leucine dipeptide. (A) Growth of WT UTI89 in SU-5 medium; (B) Growth of WT W3110 in SU-5 medium; and (C) Growth of WT UTI89 in SU-AL medium. W3110 did not grow in SU-AL medium. The curves are averages of three independent experiments and the error bars represent the standard deviations.

Main Paper Figures

FIG 5

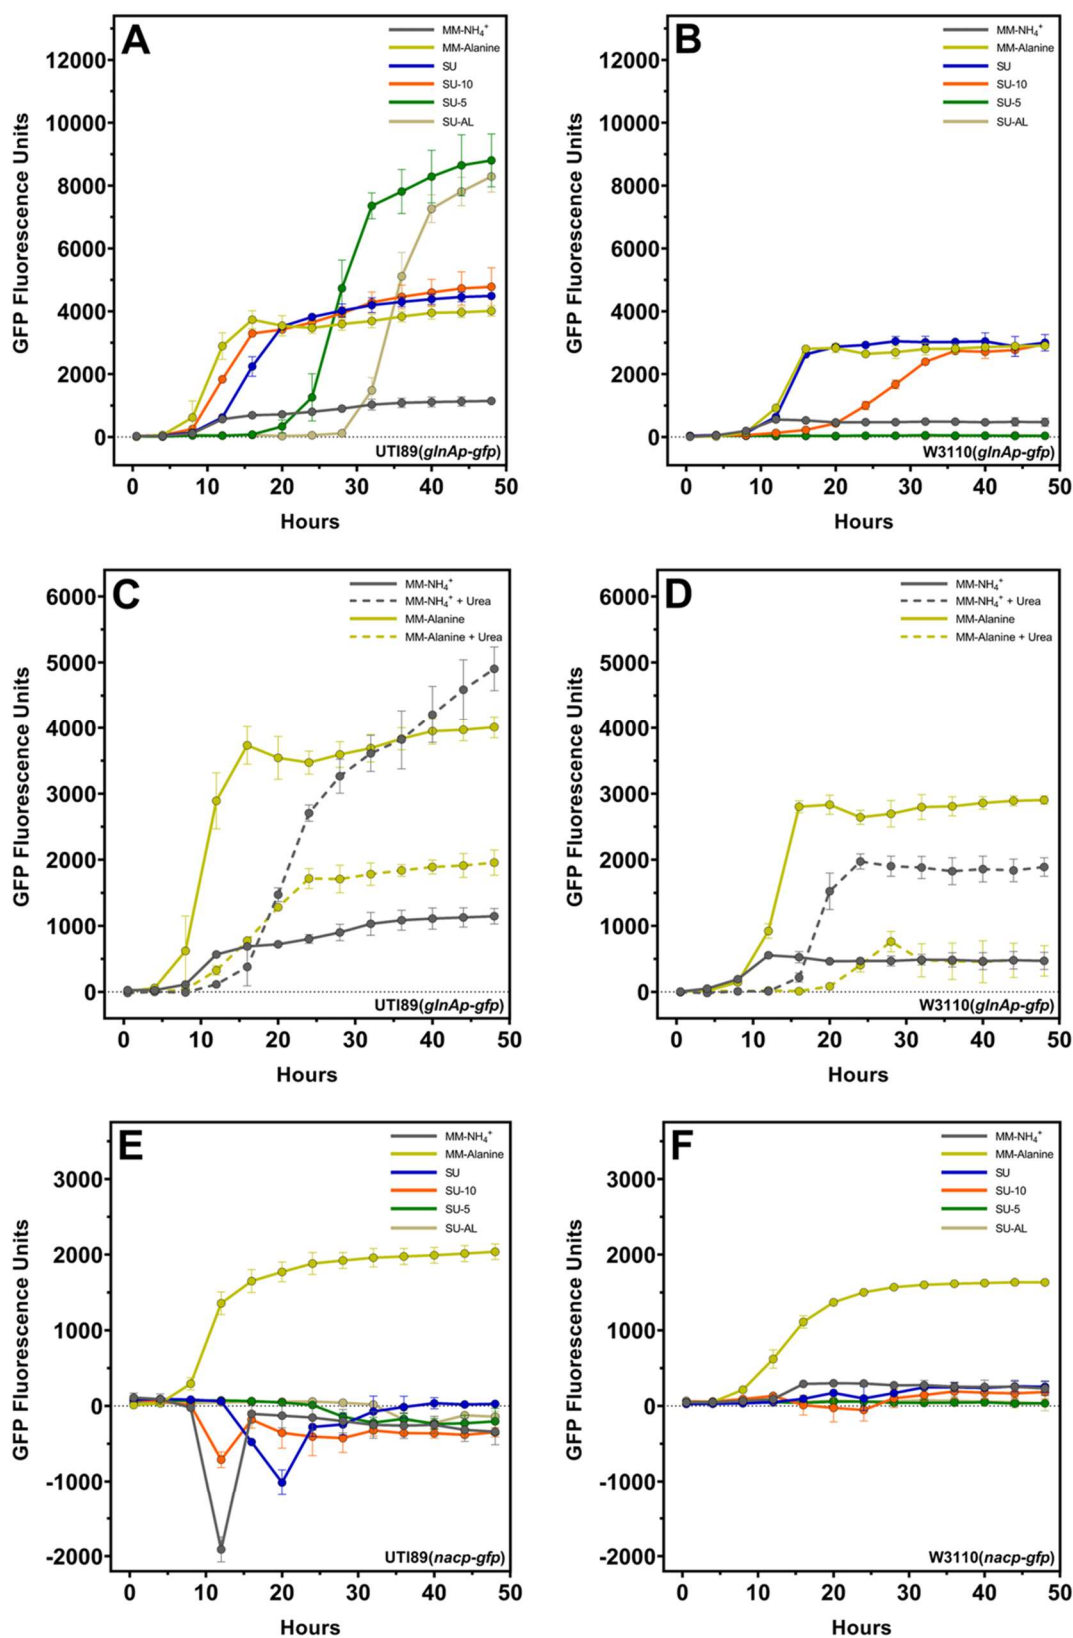

**Figure 5: Effect of amino acids and urea on *glnA* and *nac* expression.** *glnA* expression in the indicated media for (A) WT UT189 and (B) WT W3110 – *glnA* expression in SU is comparable to expression levels in MM-alanine. Growth in SU-5 or SU-AL induces higher *glnA* expression for UT189. *glnA* expression in nitrogen-limited (MM-alanine) and nitrogen-excess (MM-NH<sub>4</sub><sup>+</sup>) minimal media with and without urea for (C) UT189 and (D) W3110 – Urea induces *glnA* expression in MM-NH<sub>4</sub><sup>+</sup> but represses expression in MM-alanine. *nac* expression in the indicated media for (E) WT UT189 and (F) WT W3110 – *nac* is not expressed during growth in SU in both strains. All curves represent average expression from three independent experiments measured concurrently with growth in respective media and error bars represent standard deviations.

FIG 6

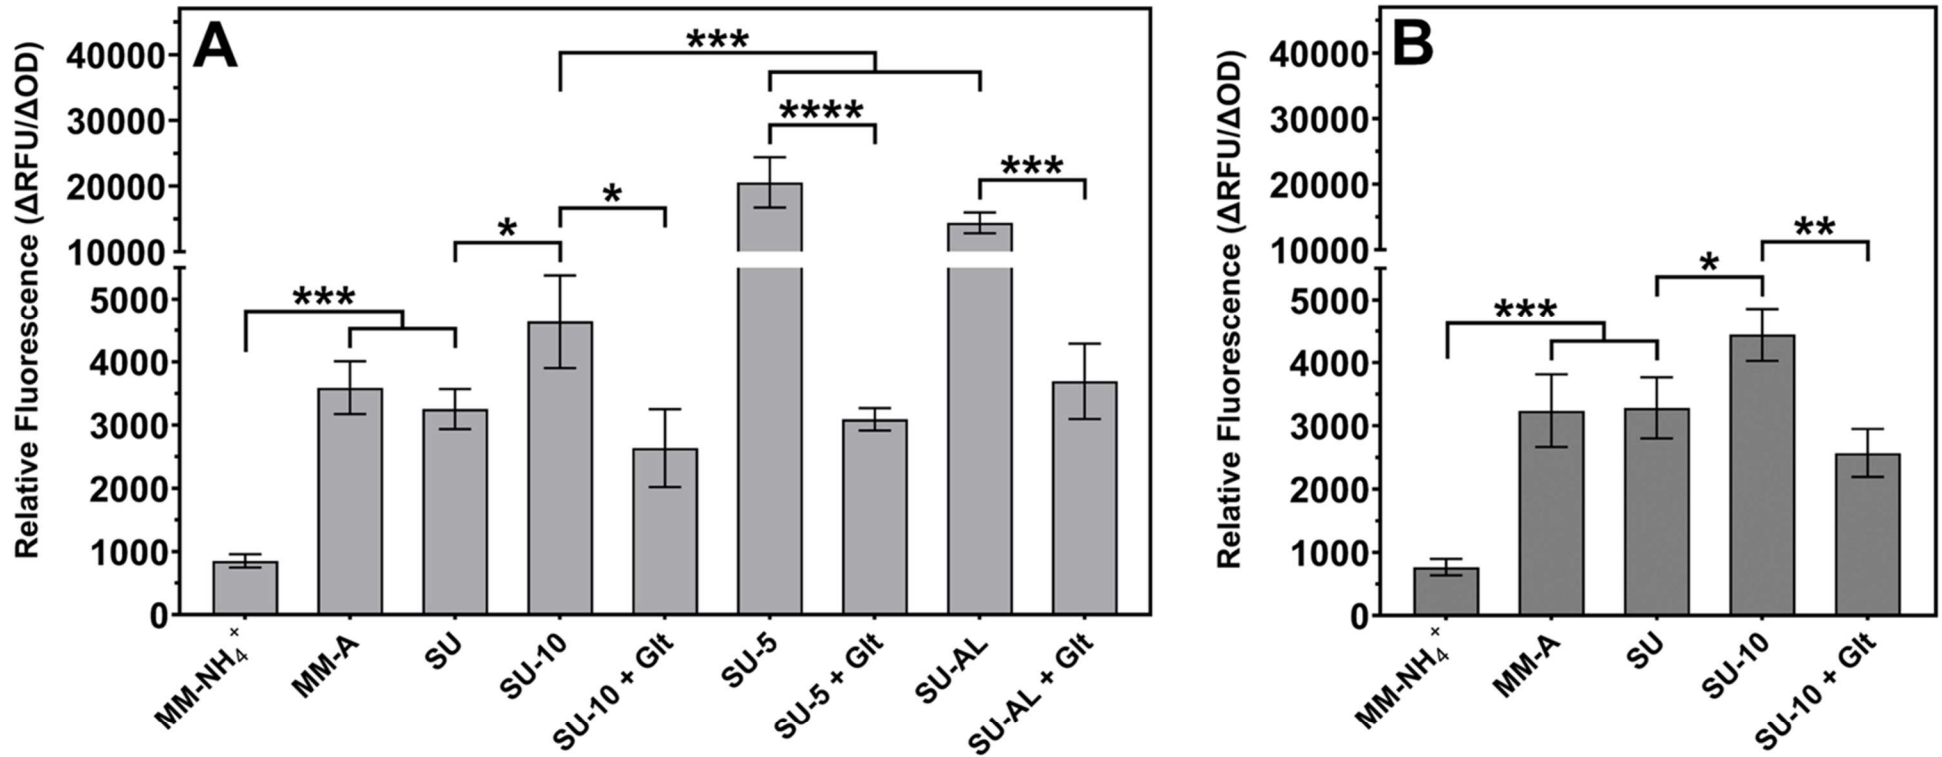

**Figure 6: Relative transcriptional expression of *glnA* in different media.** *glnA* expression in **(A)** WT UTI89 and **(B)** WT W3110. Because W3110 did not grow in SU-5 or SU-AL, there is no expression data. Significance was calculated using one-way ANOVA along with Dunnett's multiple comparisons test; \*  $p \leq 0.05$ ; \*\*  $p \leq 0.01$ ; \*\*\*  $p \leq 0.001$ ; \*\*\*\*  $p \leq 0.0001$ . The data are averages of three independent experiments and the error bars represent the standard deviations.



FIG 7

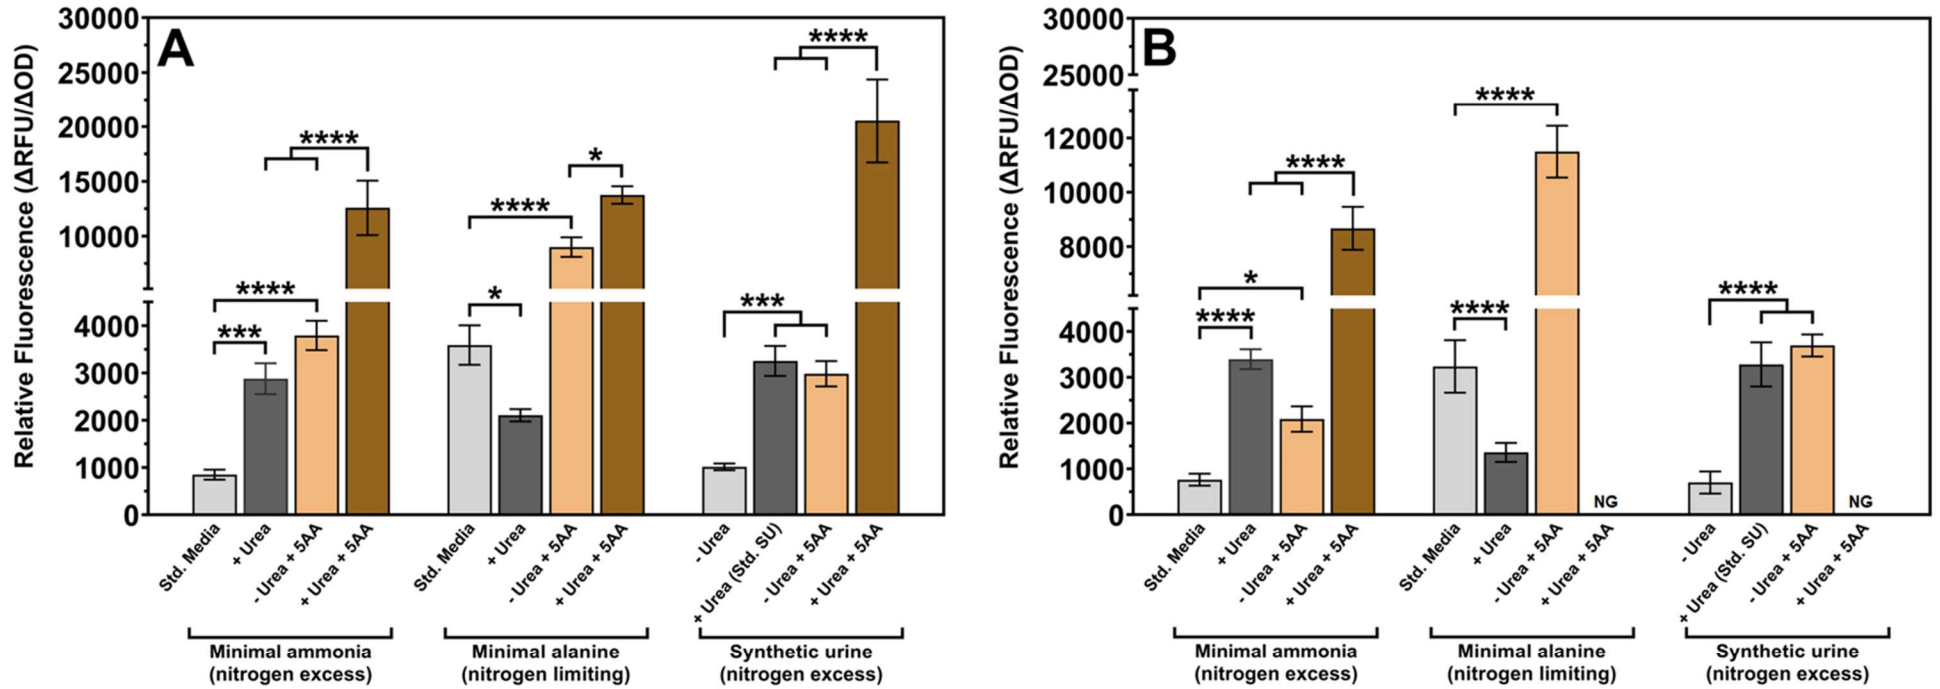

Figure 7: Relative transcriptional expression of *glnA* was altered by urea and the abundant urinary amino acids. (A) WT UTI89 and (B) WT W3110. NG means no growth. Significance was calculated using one-way ANOVA along with Dunnett's multiple comparisons test; \*  $p \leq 0.05$ ; \*\*  $p \leq 0.01$ ; \*\*\*  $p \leq 0.001$ ; \*\*\*\*  $p \leq 0.0001$ . The data are averages of three independent experiments and the error bars represent the standard deviations.

## FIG 8

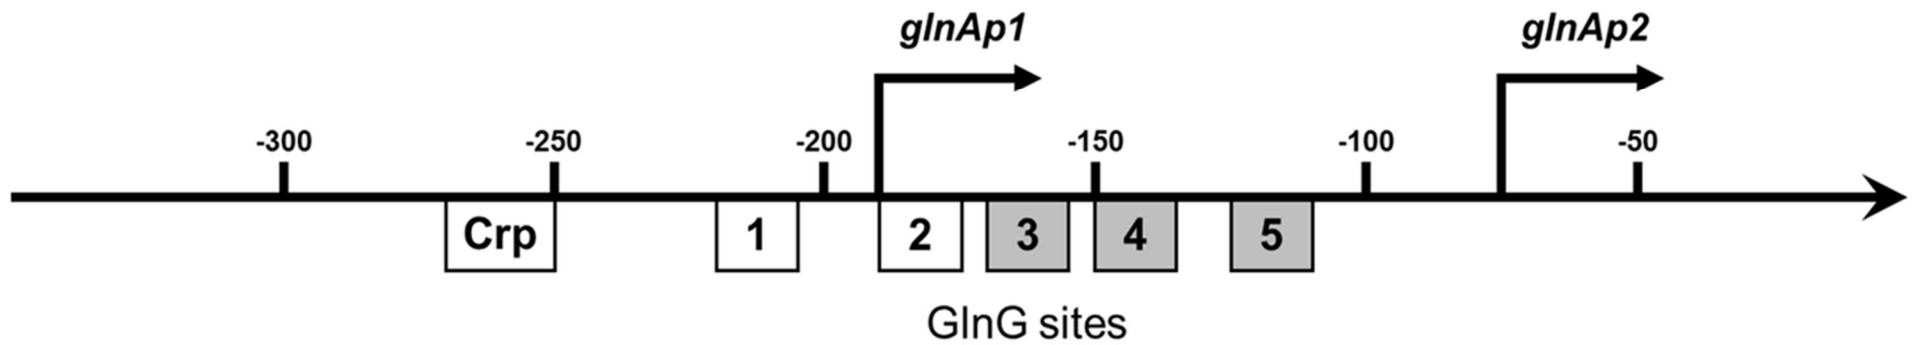

**Figure 8: The *glnA* regulatory region.** The binding sites are drawn to scale. GlnG sites 1 and 2 are strong sites required for activation from the *glnAp2* promoter, while sites 3-5 (shaded) appear to modulate activated expression (41). Crp-binding site(s) have not been experimentally determined for the *glnA* regulatory region. EcoCyc describes a Crp binding site from -133 to -120 which is between the strong GlnG binding sites and the RNA polymerase binding site (16).

## FIG 9

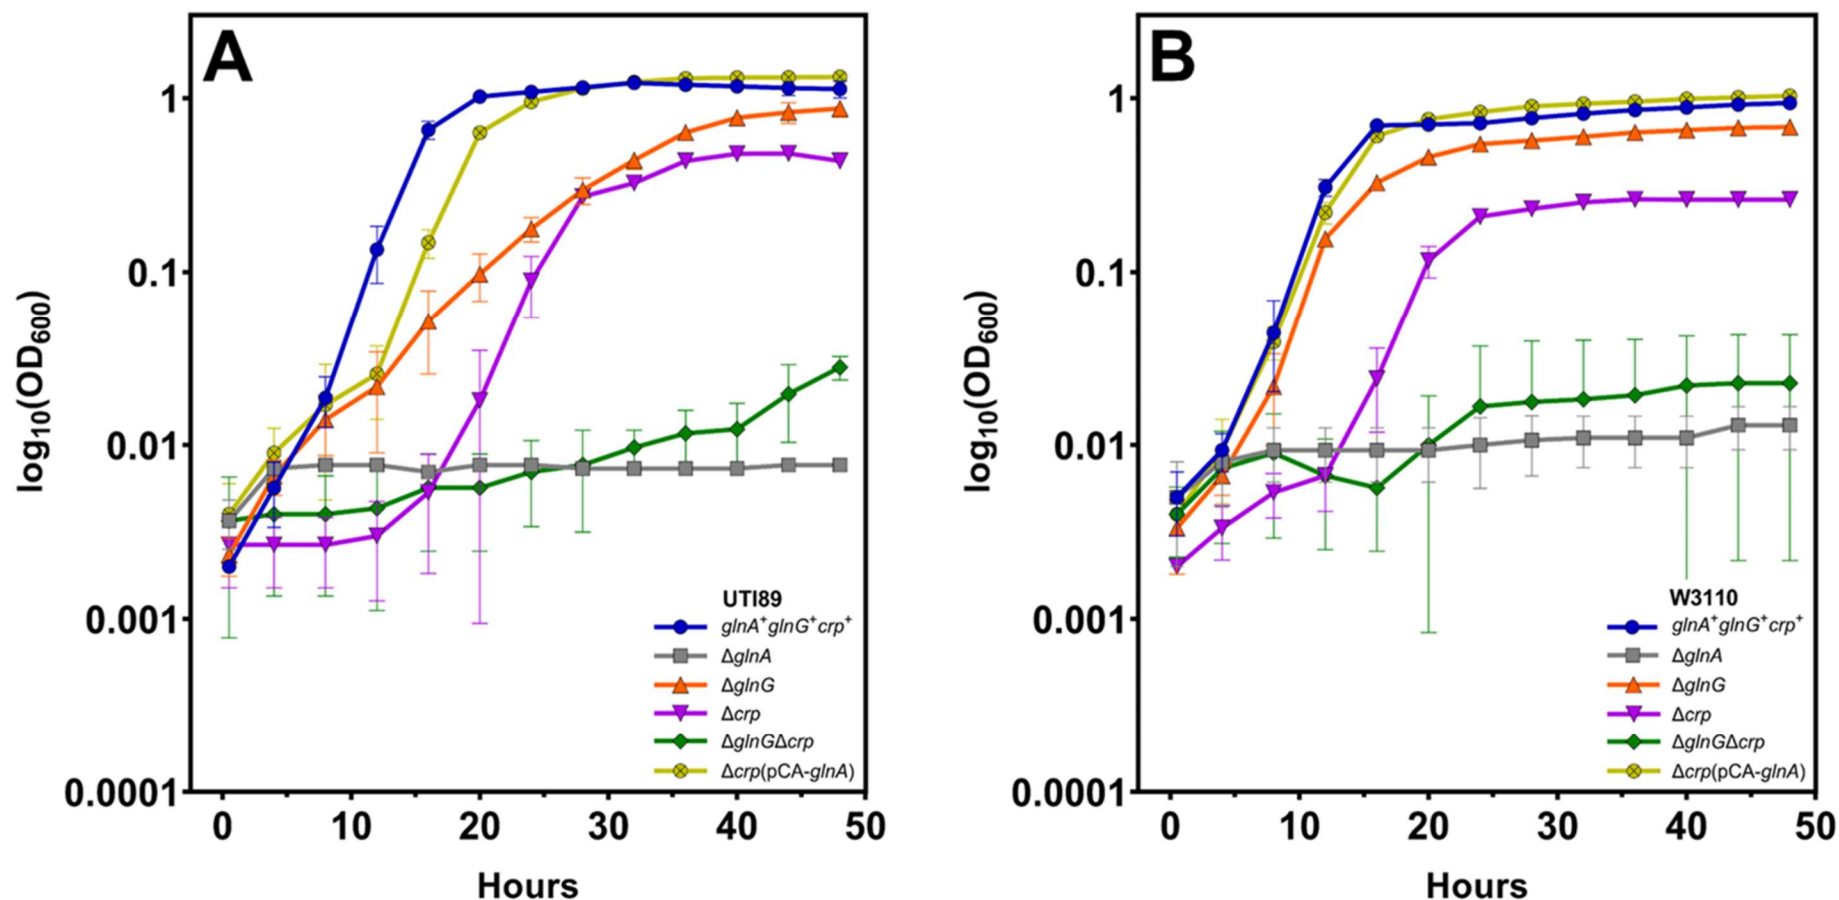

**Figure 9: Growth phenotypes of  $\Delta glnG$ ,  $\Delta crp$  and  $\Delta glnG\Delta crp$  mutants in SU medium.** Growth of (A) UTI89 mutants and (B) W3110 mutants in SU medium. Growth is defective for  $\Delta crp$  strains but not for  $\Delta glnG$  strains. Overexpression of *glnA* in the  $\Delta crp$  mutants restored growth back to WT levels in both strains. The curves are averages of three independent experiments and the error bars represent the standard deviations. Doubling times are provided in supplemental tables.



FIG 10

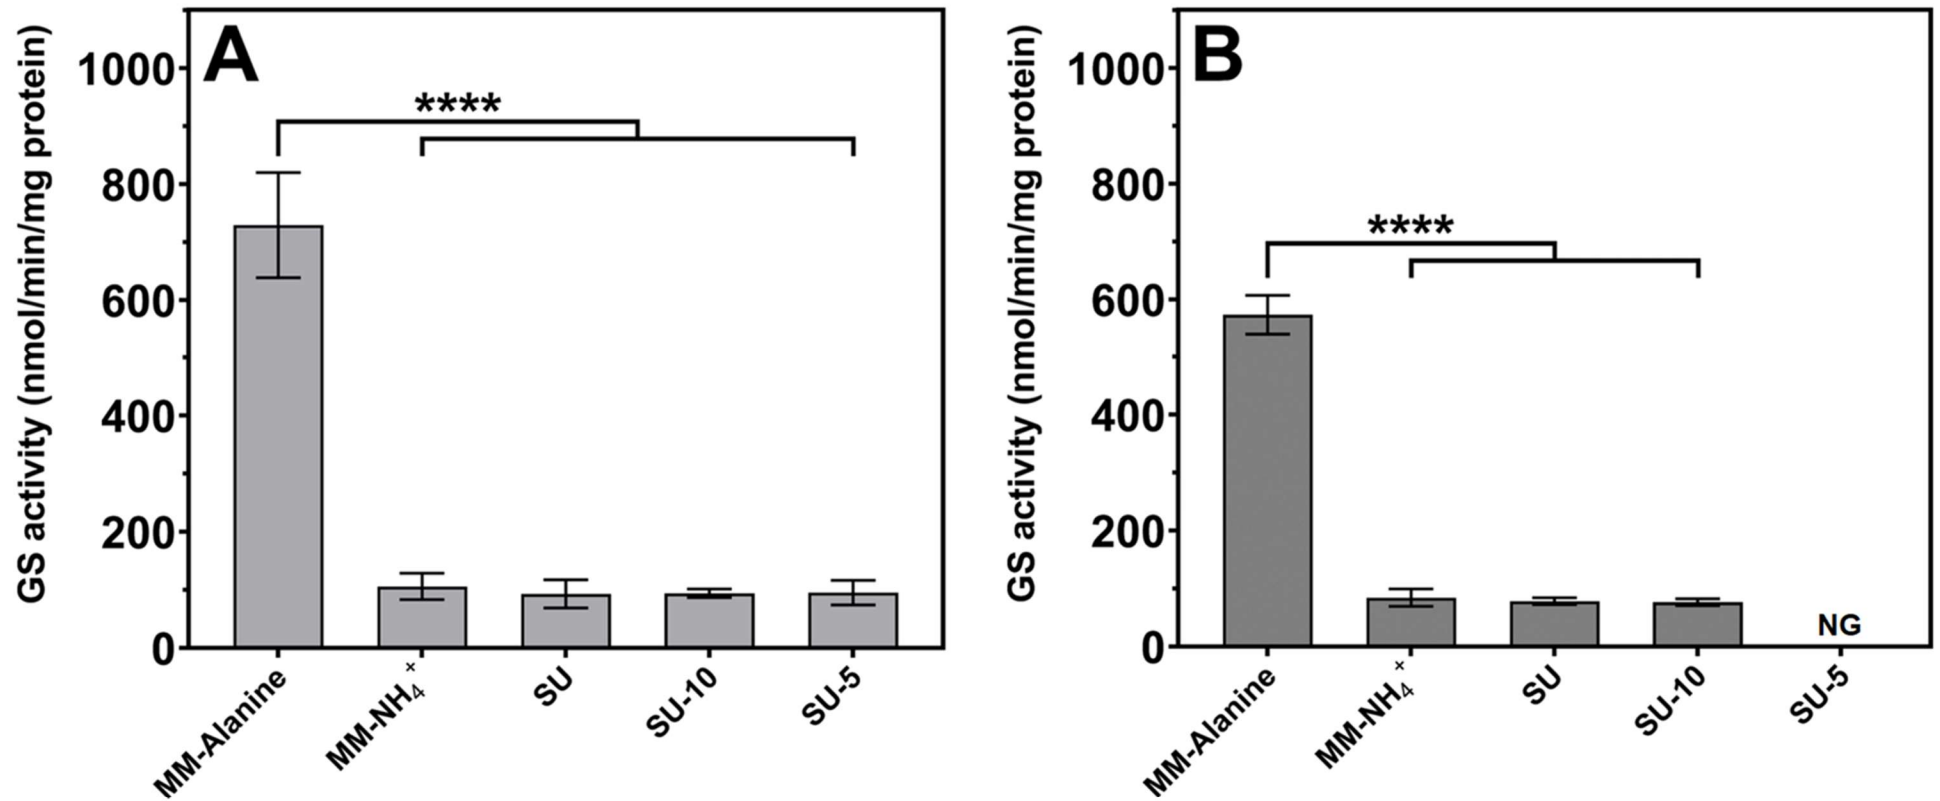

**Figure 10: Glutamine synthetase activity during growth in various media.** GS activity in **(A)** WT UTI89 and **(B)** WT W3110. NG means no growth. GS activity was not detectable in urea-containing media even though *glnA* was transcribed (see Figs. 5 and 6). Significance was calculated using one-way ANOVA along with Dunnett's multiple comparisons test; \*\*\*\*  $p \leq 0.0001$ . The data are averages of three independent experiments and the error bars represent the standard deviations.

## FIG 11

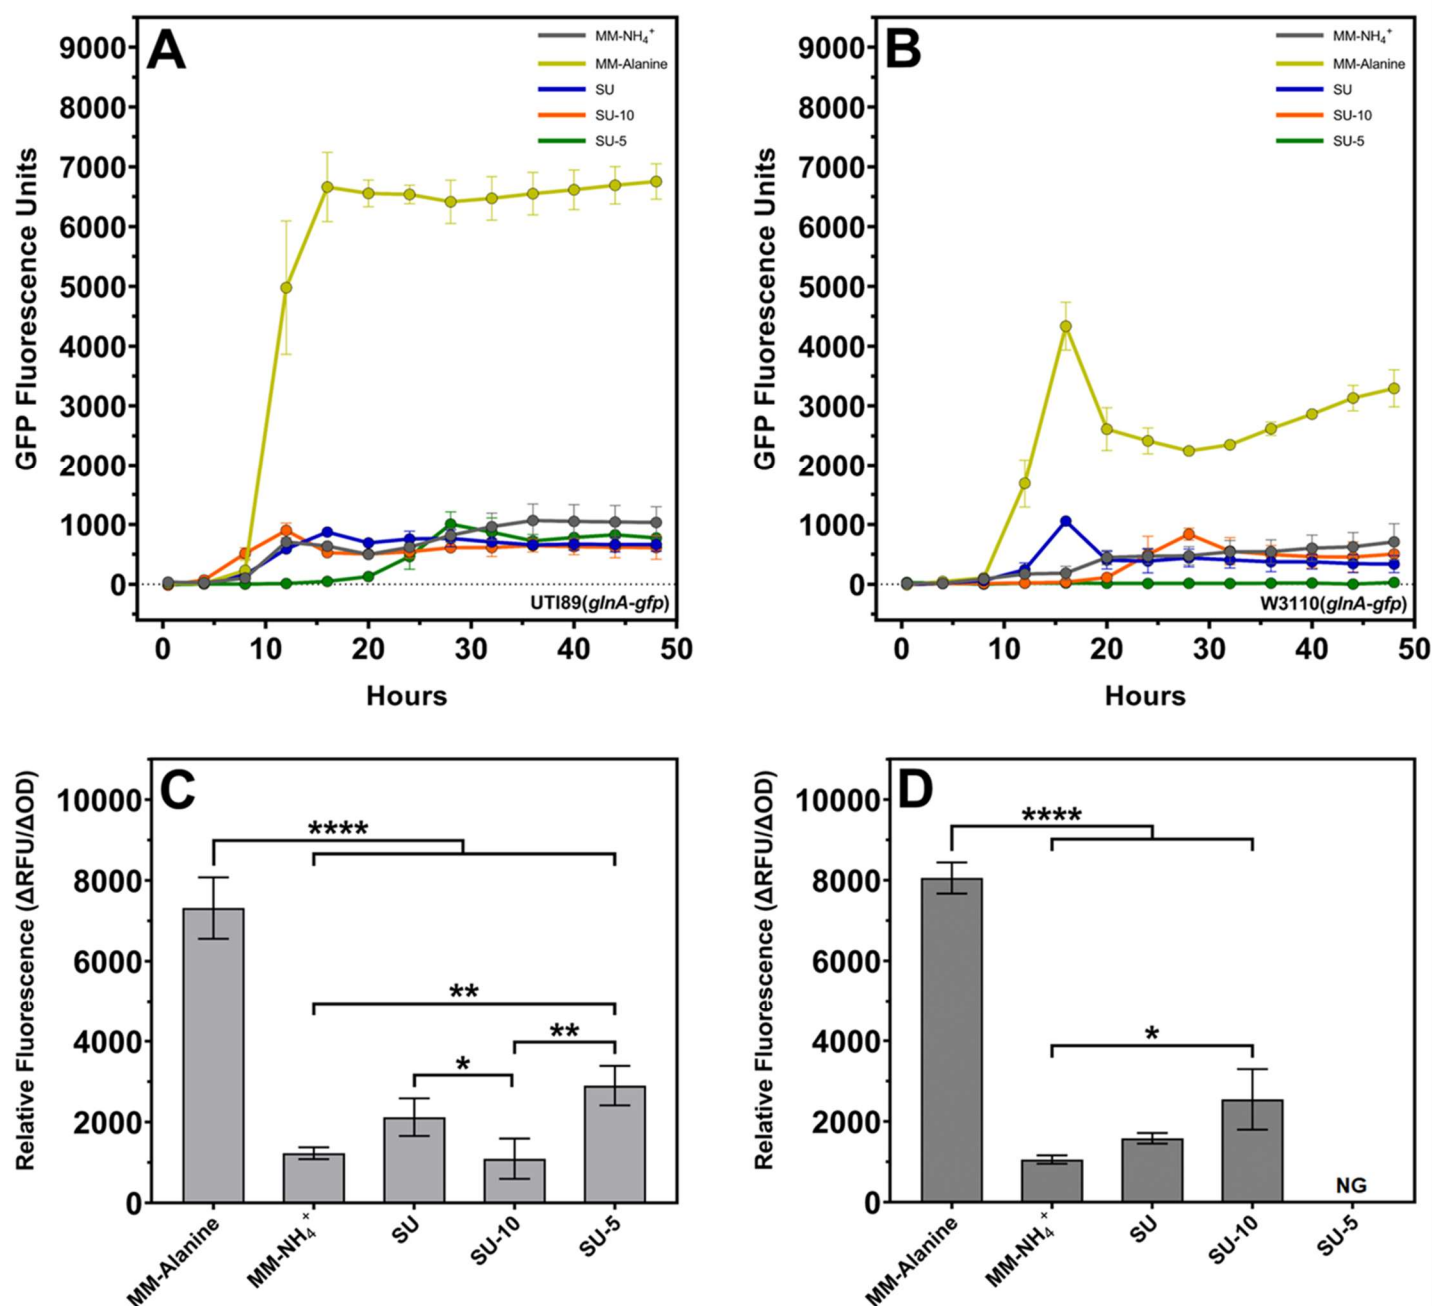

**Figure 11: Translational expression of *glnA*.** Expression during growth is shown for (A) WT UTI89 and (B) WT W3110 and quantified for (C) UTI89 and (D) W3110. NG means no growth. *glnA* mRNA was not translated during growth in urea-containing media even though *glnA* was transcribed (see Fig. 5). Significance was calculated using one-way ANOVA along with Dunnett's multiple comparisons test; \*  $p \leq 0.05$ ; \*\*  $p \leq 0.01$ ; \*\*\*\*  $p \leq 0.0001$ . The data are averages of three independent experiments and the error bars represent the standard deviations.

Table S1: Growth kinetics of UTI89 Strains

Table S1A: Doubling times in hours

| Media Type                      | Abundant Amino Acids (a) | Glucose (mM)                | Supplements                   | Strains       |               |               |              |                         |                          |                         |                                    |
|---------------------------------|--------------------------|-----------------------------|-------------------------------|---------------|---------------|---------------|--------------|-------------------------|--------------------------|-------------------------|------------------------------------|
|                                 |                          |                             |                               | WT            | $\Delta glnA$ | $\Delta glnG$ | $\Delta crp$ | $\Delta glnG\Delta crp$ | $\Delta glnA$ (pCA-glnA) | $\Delta crp$ (pCA-glnA) | $\Delta glnG\Delta crp$ (pCA-glnA) |
| MM-NH <sub>4</sub> <sup>+</sup> |                          | Minimal 'W' salts - ammonia |                               | 1.6 ± 0.1     | -             | 1.8 ± 0.1     | 1.3 ± 0.1    | -                       | 1.7 ± 0.0                | 1.5 ± 0.2               | 1.9 ± 0.2                          |
| MM-A                            |                          | Minimal 'W' salts - alanine |                               | 1.8 ± 0.1     | -             | -             | 3.8 ± 0.4*** | -                       | 1.7 ± 0.1                | 1.9 ± 0.3               | 1.7 ± 0.4                          |
| SU                              |                          | 10                          |                               | 1.9 ± 0.2     | -             | 6.5 ± 0.2**** | 2.4 ± 0.5    | -                       | 2.3 ± 0.4                | 2.7 ± 0.3               | 3.0 ± 0.5*                         |
| SU-5                            | +                        | 10                          |                               | 4.0 ± 0.5**** | -             | 6.7 ± 1.1     | 4.0 ± 0.8    | -                       | 4.4 ± 1.4                | 2.6 ± 0.4               | 4.4 ± 0.7                          |
| SU-10                           | +                        | 10                          | AA (b)                        | 2.0 ± 0.2     | 1.5 ± 0.1     | 4.1 ± 0.2***  | 1.4 ± 0.1    | 5.0 ± 0.3****           | 2.5 ± 0.6                | 1.7 ± 0.5               | 3.2 ± 0.3*                         |
| SU-5 + CAA                      | +                        | 10                          | 0.02% CAA                     | 1.9 ± 0.2     | 2.0 ± 0.2     | NT (c)        | NT           | NT                      | NT                       | NT                      | NT                                 |
| SU-5 + Trp                      | +                        | 10                          | 0.02% Tryptone                | 1.5 ± 0.1     | 2.4 ± 0.5     | NT            | NT           | NT                      | NT                       | NT                      | NT                                 |
| SU-5 + Git                      | +                        | 10                          | 5 mM Glutamate                | 2.8 ± 0.4     | 1.6 ± 0.3*    | 3.5 ± 0.5     | 3.5 ± 0.4    | 4.1 ± 0.7*              | 2.2 ± 0.3                | 2.0 ± 0.3               | 3.5 ± 0.3                          |
| SU-AA                           |                          | 10                          | AA                            | 1.8 ± 0.3     | -             | 3.6 ± 0.1***  | 1.5 ± 0.0    | -                       | 2.1 ± 0.1                | 1.7 ± 0.3               | 2.0 ± 0.4                          |
| SU-AL-AA                        |                          | 10                          | AA + 5 mM Ala-Leu             | 2.7 ± 0.6     | -             | 8.2 ± 0.5**** | 6.2 ± 1.2*   | -                       | 2.0 ± 0.1                | 2.4 ± 0.6               | 4.1 ± 0.8                          |
| SU-AL                           |                          | 10                          | 5 mM Ala-Leu                  | 3.9 ± 0.1***  | -             | 5.7 ± 0.1*    | 3.2 ± 0.4    | -                       | 3.9 ± 0.9                | 3.1 ± 0.4               | 5.7 ± 0.3*                         |
| SU-AL + Git                     |                          | 10                          | 5 mM Ala-Leu + 5 mM Glutamate | 2.4 ± 0.5     | -             | 4.0 ± 0.3*    | 3.5 ± 0.1*   | -                       | 2.7 ± 0.5                | 1.8 ± 0.2               | 4.1 ± 0.9*                         |

Table S1B: Final cell densities in (x10<sup>8</sup>) CFU/ml

| Media Type                      | Abundant Amino Acids (a) | Glucose (mM)                | Supplements                   | Strains      |               |               |               |                         |                          |                         |                                    |
|---------------------------------|--------------------------|-----------------------------|-------------------------------|--------------|---------------|---------------|---------------|-------------------------|--------------------------|-------------------------|------------------------------------|
|                                 |                          |                             |                               | WT           | $\Delta glnA$ | $\Delta glnG$ | $\Delta crp$  | $\Delta glnG\Delta crp$ | $\Delta glnA$ (pCA-glnA) | $\Delta crp$ (pCA-glnA) | $\Delta glnG\Delta crp$ (pCA-glnA) |
| MM-NH <sub>4</sub> <sup>+</sup> |                          | Minimal 'W' salts - ammonia |                               | 8.8 ± 1.2    | -             | 8.5 ± 1.1     | 6.8 ± 0.6     | -                       | 9.2 ± 0.6                | 9.2 ± 0.5               | 8.5 ± 1.1                          |
| MM-A                            |                          | Minimal 'W' salts - alanine |                               | 8.2 ± 1.0    | -             | -             | 7.7 ± 1.0     | -                       | 9.2 ± 0.8                | 9.3 ± 1.2               | 8.3 ± 0.2                          |
| SU                              |                          | 10                          |                               | 9.7 ± 0.6    | -             | 7.0 ± 1.1     | 2.7 ± 0.2*    | -                       | 8.5 ± 0.8                | 11.0 ± 3.1              | 9.0 ± 1.1                          |
| SU-5                            | +                        | 10                          |                               | 6.3 ± 1.0**  | -             | 5.5 ± 1.1     | 2.2 ± 0.2**   | -                       | 9.5 ± 0.7*               | 8.7 ± 1.2               | 9.3 ± 0.5*                         |
| SU-10                           | +                        | 10                          | AA (b)                        | 9.5 ± 0.7    | 1.0 ± 0.2**** | 8.2 ± 1.2     | 4.2 ± 0.8**   | 1.3 ± 0.5****           | 9.2 ± 0.6                | 9.3 ± 1.0               | 9.5 ± 0.4                          |
| SU-5 + CAA                      | +                        | 10                          | 0.02% CAA                     | 8.8 ± 0.6    | 1.7 ± 0.2     | NT (c)        | NT            | NT                      | NT                       | NT                      | NT                                 |
| SU-5 + Trp                      | +                        | 10                          | 0.02% Tryptone                | 8.5 ± 1.1    | 1.4 ± 0.2     | NT            | NT            | NT                      | NT                       | NT                      | NT                                 |
| SU-5 + Git                      | +                        | 10                          | 5 mM Glutamate                | 10.0 ± 0.6   | 1.5 ± 0.4**** | 8.0 ± 0.4     | 4.2 ± 0.6*    | 1.3 ± 0.3****           | 9.2 ± 0.8                | 12.0 ± 2.4              | 12.0 ± 2.5                         |
| SU-AA                           |                          | 10                          | AA                            | 9.2 ± 0.6    | -             | 7.5 ± 1.1     | 3.3 ± 0.6***  | -                       | 8.5 ± 0.7                | 9.2 ± 0.8               | 8.3 ± 1.0                          |
| SU-AL-AA                        |                          | 10                          | AA + 5 mM Ala-Leu             | 12.0 ± 2.4   | -             | 8.5 ± 1.5     | 2.2 ± 0.6**** | -                       | 8.8 ± 1.3                | 9.8 ± 0.2               | 9.0 ± 0.4                          |
| SU-AL                           |                          | 10                          | 5 mM Ala-Leu                  | 6.5 ± 1.1*** | -             | 3.7 ± 0.6     | 1.8 ± 0.2**   | -                       | 8.3 ± 1.4                | 7.5 ± 0.7               | 8.8 ± 0.8                          |
| SU-AL + Git                     |                          | 10                          | 5 mM Ala-Leu + 5 mM Glutamate | 10.0 ± 0.5   | -             | 12.0 ± 2.5    | 3.7 ± 1.0***  | -                       | 11.0 ± 2.8               | 9.8 ± 0.2               | 8.7 ± 1.0                          |

a – Abundant amino acids: Amino acids ≥ 0.5 mM in complete amino acid mix - 2.1 mM Glycine, 1.2 mM Histidine, 0.6 mM Cysteine, 0.5 mM Serine & 0.5 mM Alanine.

b – Non-Abundant amino acids: Amino acids < 0.5 mM in complete amino acid mix - 0.4 mM Leucine, 0.2 mM Aspartate, 0.2 mM Threonine, 0.1 mM Methionine and 0.1 mM Glutamate.

c – Not tested (NT)

CAA: Casamino Acids, Ala-Leu: Alanyl-Leucine dipeptide.

Significance was calculated using one-way ANOVA along with Dunnett's multiple comparisons test; \* p ≤ 0.05; \*\* p ≤ 0.01; \*\*\* p ≤ 0.001; \*\*\*\* p ≤ 0.0001.

Significance stars – in **black**: compared to WT strain during growth in a particular medium; in **red** (comparison across media types for WT strain) – compared to growth in Basal SU medium (SU).



Table S2: Growth kinetics of W3110 Strains

Table S2A: Doubling times in hours

| Media Type                      | Abundant Amino Acids (a) | Glucose (mM)                | Supplements                   | Strains       |               |                |               |                         |                          |                         |                                    |
|---------------------------------|--------------------------|-----------------------------|-------------------------------|---------------|---------------|----------------|---------------|-------------------------|--------------------------|-------------------------|------------------------------------|
|                                 |                          |                             |                               | WT            | $\Delta glnA$ | $\Delta glnG$  | $\Delta crp$  | $\Delta glnG\Delta crp$ | $\Delta glnA$ (pCA-glnA) | $\Delta crp$ (pCA-glnA) | $\Delta glnG\Delta crp$ (pCA-glnA) |
| MM-NH <sub>4</sub> <sup>+</sup> |                          | Minimal 'W' salts - ammonia |                               | 1.7 ± 0.1     | -             | 10.3 ± 1.2**** | 1.8 ± 0.0     | -                       | 2.4 ± 0.3                | 2.0 ± 0.1               | 1.9 ± 0.2                          |
| MM-A                            |                          | Minimal 'W' salts - alanine |                               | 2.4 ± 0.3**   | -             | -              | 4.9 ± 0.1**** | -                       | 3.5 ± 0.4*               | 2.3 ± 0.2               | 2.0 ± 0.1                          |
| SU                              |                          | 10                          |                               | 2.2 ± 0.1*    | -             | 3.5 ± 0.2***   | 1.9 ± 0.3     | -                       | 2.0 ± 0.2                | 2.3 ± 0.1               | 1.5 ± 0.2*                         |
| SU-5                            | +                        | 10                          |                               | -             | -             | -              | -             | -                       | -                        | 4.8 ± 0.4               | -                                  |
| SU-10                           | +                        | 10                          | AA (b)                        | 4.0 ± 0.3**** | -             | 3.2 ± 0.3      | 1.9 ± 0.4     | -                       | 2.1 ± 0.3***             | 2.3 ± 0.4**             | 3.8 ± 0.2                          |
| SU-5 + CAA                      | +                        | 10                          | 0.02% CAA                     | 1.6 ± 0.2**** | -             | NT (c)         | NT            | NT                      | NT                       | NT                      | NT                                 |
| SU-5 + Trp                      | +                        | 10                          | 0.02% Tryptone                | 1.2 ± 0.0**** | -             | NT             | NT            | NT                      | NT                       | NT                      | NT                                 |
| SU-5 + Glt                      | +                        | 10                          | 5 mM Glutamate                | -             | -             | -              | -             | -                       | 6.6 ± 1.2                | 5.0 ± 0.5               | 3.6 ± 0.7                          |
| SU-AA                           |                          | 10                          | AA                            | 2.2 ± 0.1     | -             | 7.9 ± 1.4****  | 3.9 ± 1.5     | -                       | 2.2 ± 0.3                | 2.3 ± 0.9               | 1.7 ± 0.1                          |
| SU-AL-AA                        |                          | 10                          | AA + 5 mM Ala-Leu             | -             | -             | -              | -             | -                       | 3.2 ± 0.4                | 1.7 ± 0.2               | 5.0 ± 0.9                          |
| SU-AL                           |                          | 10                          | 5 mM Ala-Leu                  | -             | -             | -              | -             | -                       | -                        | -                       | -                                  |
| SU-AL + Glt                     |                          | 10                          | 5 mM Ala-Leu + 5 mM Glutamate | -             | -             | -              | -             | -                       | 5.2 ± 0.4                | 6.5 ± 0.5               | 3.4 ± 0.8                          |

Table S2B: Final cell densities in ( $\times 10^8$ ) CFU/ml

| Media Type                      | Abundant Amino Acids (a) | Glucose (mM)                | Supplements                   | Strains      |               |               |              |                         |                          |                         |                                    |
|---------------------------------|--------------------------|-----------------------------|-------------------------------|--------------|---------------|---------------|--------------|-------------------------|--------------------------|-------------------------|------------------------------------|
|                                 |                          |                             |                               | WT           | $\Delta glnA$ | $\Delta glnG$ | $\Delta crp$ | $\Delta glnG\Delta crp$ | $\Delta glnA$ (pCA-glnA) | $\Delta crp$ (pCA-glnA) | $\Delta glnG\Delta crp$ (pCA-glnA) |
| MM-NH <sub>4</sub> <sup>+</sup> |                          | Minimal 'W' salts - ammonia |                               | 6.0 ± 1.2    | -             | 6.3 ± 1.0     | 6.3 ± 0.6    | -                       | 6.5 ± 0.8                | 6.0 ± 1.1               | 6.2 ± 0.8                          |
| MM-A                            |                          | Minimal 'W' salts - alanine |                               | 4.5 ± 0.8    | -             | -             | 4.8 ± 1.0    | -                       | 4.2 ± 0.2                | 5.5 ± 0.7               | 4.3 ± 0.6                          |
| SU                              |                          | 10                          |                               | 6.5 ± 1.1    | -             | 5.2 ± 0.6     | 1.8 ± 0.9**  | -                       | 7.0 ± 1.2                | 7.3 ± 1.0               | 7.5 ± 1.2                          |
| SU-5                            | +                        | 10                          |                               | -            | -             | -             | -            | -                       | -                        | 2.3 ± 0.6               | -                                  |
| SU-10                           | +                        | 10                          | AA (b)                        | 3.8 ± 0.2*   | -             | 3.0 ± 0.4     | 1.7 ± 0.2**  | -                       | 4.5 ± 0.4                | 4.7 ± 0.6               | 4.2 ± 0.2                          |
| SU-5 + CAA                      | +                        | 10                          | 0.02% CAA                     | 2.3 ± 0.5*** | -             | NT (c)        | NT           | NT                      | NT                       | NT                      | NT                                 |
| SU-5 + Trp                      | +                        | 10                          | 0.02% Tryptone                | 2.2 ± 0.6*** | -             | NT            | NT           | NT                      | NT                       | NT                      | NT                                 |
| SU-5 + Glt                      | +                        | 10                          | 5 mM Glutamate                | -            | -             | -             | -            | -                       | 2.7 ± 0.2                | 3.2 ± 0.6               | 2.3 ± 0.5                          |
| SU-AA                           |                          | 10                          | AA                            | 5.0 ± 0.8    | -             | 4.7 ± 0.6     | 1.8 ± 0.5**  | -                       | 6.2 ± 1.0                | 6.7 ± 0.5               | 6.8 ± 1.2                          |
| SU-AL-AA                        |                          | 10                          | AA + 5 mM Ala-Leu             | -            | -             | -             | -            | -                       | 2.7 ± 0.2                | 3.2 ± 0.2               | 2.8 ± 0.8                          |
| SU-AL                           |                          | 10                          | 5 mM Ala-Leu                  | -            | -             | -             | -            | -                       | -                        | -                       | -                                  |
| SU-AL + Glt                     |                          | 10                          | 5 mM Ala-Leu + 5 mM Glutamate | -            | -             | -             | -            | -                       | 2.2 ± 0.2                | 2.5 ± 1.1               | 2.5 ± 0.4*                         |

a – Abundant amino acids: Amino acids  $\geq 0.5$  mM in complete amino acid mix - 2.1 mM Glycine, 1.2 mM Histidine, 0.6 mM Cysteine, 0.5 mM Serine & 0.5 mM Alanine.

b – Non-Abundant amino acids: Amino acids  $< 0.5$  mM in complete amino acid mix - 0.4 mM Leucine, 0.2 mM Aspartate, 0.2 mM Threonine, 0.1 mM Methionine and 0.1 mM Glutamate.

c – Not tested (NT)

CAA: Casamino Acids, Ala-Leu: Alanyl-Leucine dipeptide.

Significance was calculated using one-way ANOVA along with Dunnett's multiple comparisons test; \*  $p \leq 0.05$ ; \*\*  $p \leq 0.01$ ; \*\*\*  $p \leq 0.001$ ; \*\*\*\*  $p \leq 0.0001$ .

Significance stars – in **black**: compared to WT strain during growth in a particular medium; in **green** (only for WT strains) – compared to growth in MM-ammonia; in **red** (comparison across media types for WT strain) – compared to growth in Basal SU medium (SU).

Table S3: Primers used

| Primer origin                                                | Primer Sequence (5' to 3')                                                                                               | Usage Information                                                                                                                                                                                |
|--------------------------------------------------------------|--------------------------------------------------------------------------------------------------------------------------|--------------------------------------------------------------------------------------------------------------------------------------------------------------------------------------------------|
| <b>Gene primers</b>                                          |                                                                                                                          |                                                                                                                                                                                                  |
| <i>glnA</i>                                                  | F: TAATTGCAGATTTTCGTTACCACGAC<br>R: GATAGCTGACAAACTTCACGTT                                                               | Used to confirm gene deletion after P1 transduction                                                                                                                                              |
| <i>glnG</i>                                                  | F: CTTATCCATCGCTCGTAATTTGATTGATCAGC<br>R: CTTCAGCTAAACAGCCCAATCATCGC                                                     | Used to confirm gene deletion after P1 transduction along with KEIO primers                                                                                                                      |
| <i>crp</i>                                                   | F: GTTATCTGGCTCTGGAGAAAGC<br>R: CGAAGTGCATAGTTGATATCGGG                                                                  | Used to confirm gene deletion after P1 transduction along with KEIO primers                                                                                                                      |
| <b>Plasmid primers</b>                                       |                                                                                                                          |                                                                                                                                                                                                  |
| pCA24N                                                       | F: GCGTATCACGAGGCCCTTTCGTCTTACC<br>R: TTGCATCACCTTACCCTCTCCACTGACAG                                                      | Used for plasmids with and without gene of interest to confirm plasmid insertion in strains                                                                                                      |
| pUA139                                                       | F: GAGGCCCTTTCGTCTTACGGATCC<br>R: CTAGAGCTTGCATGCCTGCAGGTCTGG                                                            | Used for plasmids with and without gene of interest to confirm plasmid insertion in strains                                                                                                      |
| <b>KEIO collection primers</b>                               |                                                                                                                          |                                                                                                                                                                                                  |
| <i>Kan</i> cassette                                          | F: kt – CGGCCACAGTCGATGAATCC (34)<br>R: k2 – CGGTGCCCTGAATGAACTGC (34)                                                   | Used to confirm deletion mutants after P1 transduction and pCP20-mediated removal of the kanamycin cassette                                                                                      |
| <b>Primers for DNA fragment amplification and sequencing</b> |                                                                                                                          |                                                                                                                                                                                                  |
| <i>glnA</i> region                                           | F: TATAAAAATAGGCGTATCACGAGGCCCTTTCGTCTTACGGATCCATGGTCTACGTGC<br>R: TCCAGTGAAAAGTTCTTCTCCTTTACTCATATCGGTGAAGCGCAAATC      | Used to amplify <i>glnAp</i> and <i>glnA</i> region with overhangs that overlap the pUA139 plasmid at the 5' end and <i>gfp</i> gene at the 3' end. Forward primer was also used for sequencing. |
| <i>gfp</i>                                                   | F: GTGAAGTTTGTTGATTTGCGCTTACCGATATGAGTAAAGGAGAAGAAC<br>R: TTTTCGTTTTATTTGATGCCTCTAGAGCTTGCATGCCTGCAGGTCTGGACATTTATTTGTAC | Used to amplify <i>gfp</i> gene in pUA139 with overhangs that overlap the <i>glnA</i> gene at the 5' end and pUA139 plasmid at the 3' end. Reverse primer was also used for sequencing.          |

## FIG S1

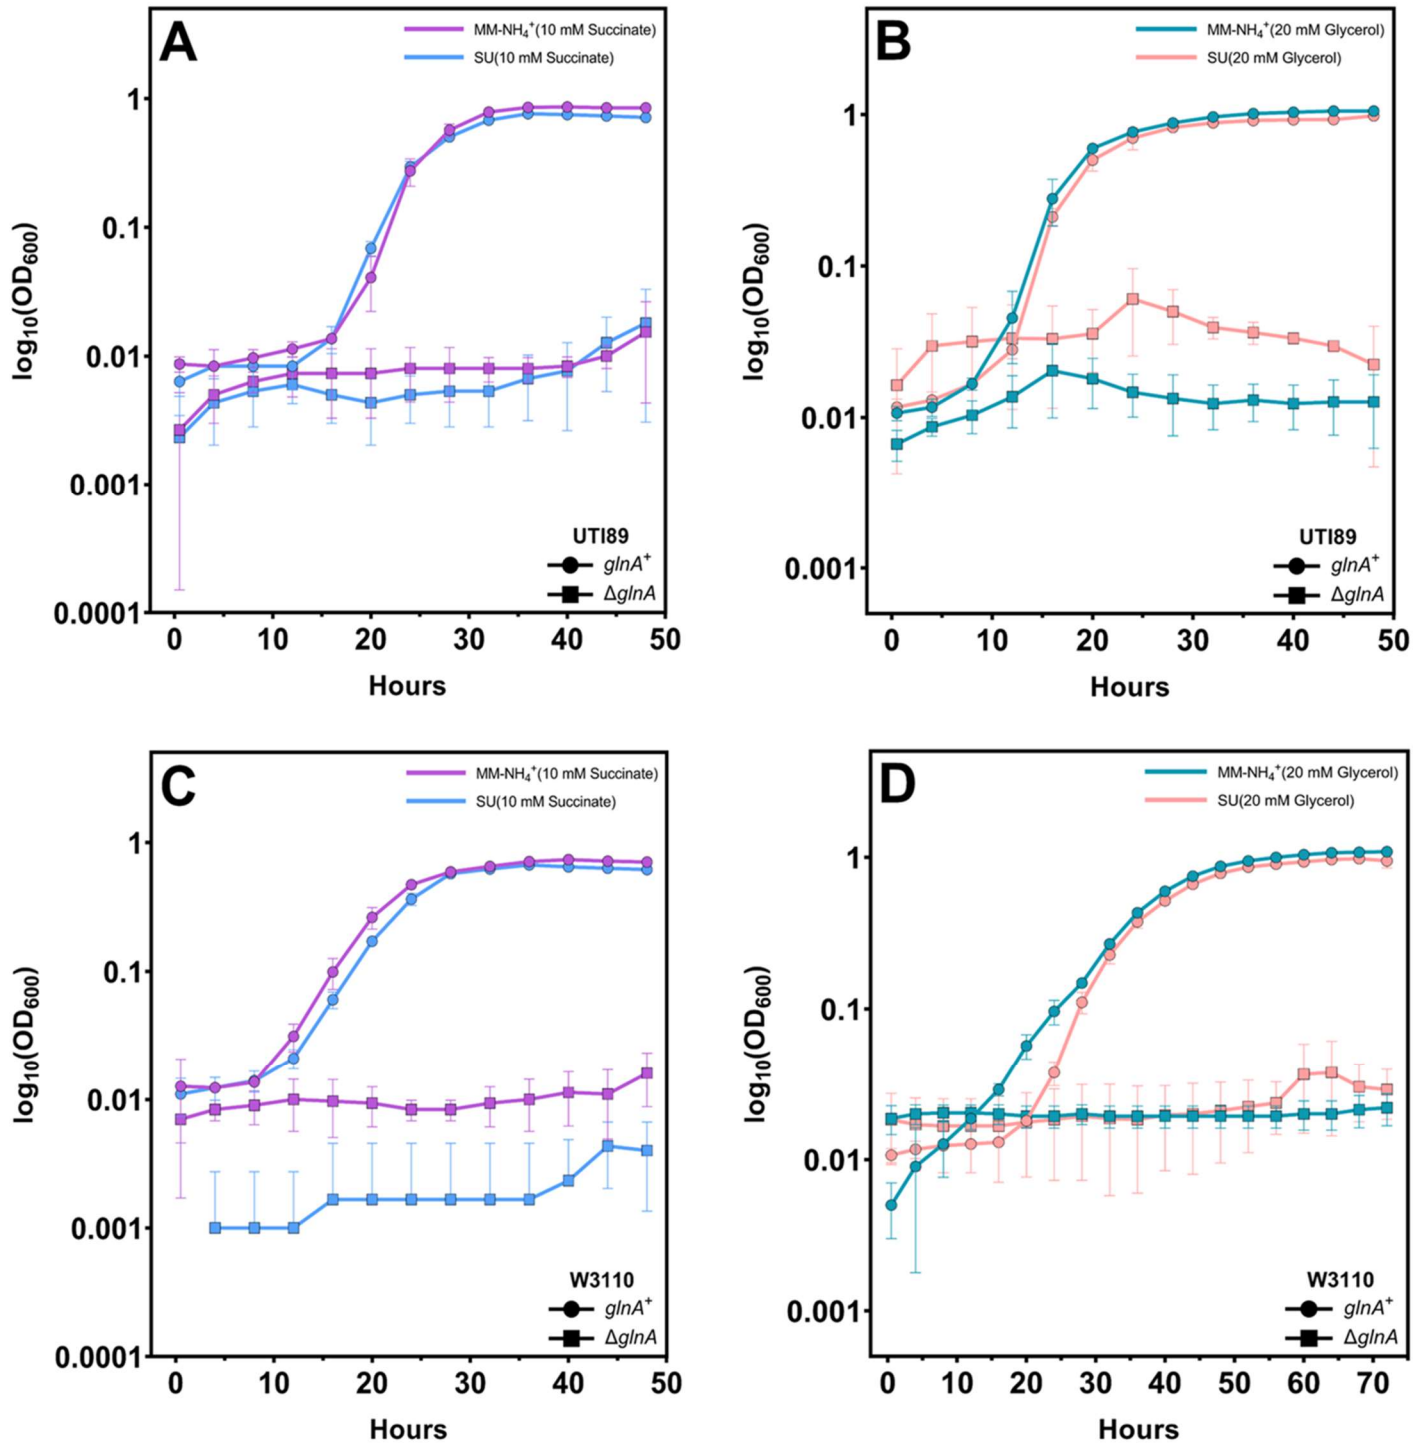

**Figure S1: Growth of UTI89 and W3110 in Basal SU Medium:** Growth of UTI89 strains in MM-NH<sub>4</sub><sup>+</sup> and SU medium with (A) 10 mM succinate or (B) 20 mM glycerol as the carbohydrate source. Growth of W3110 strains in MM-NH<sub>4</sub><sup>+</sup> and SU medium with (C) 10 mM succinate or (D) 20 mM glycerol as the carbohydrate source. The  $\Delta$ *glnA* mutants for both UTI89 and W3110 show no viability in any medium. The curves are averages of three independent experiments and the error bars represent the standard deviations.

# FIG S2

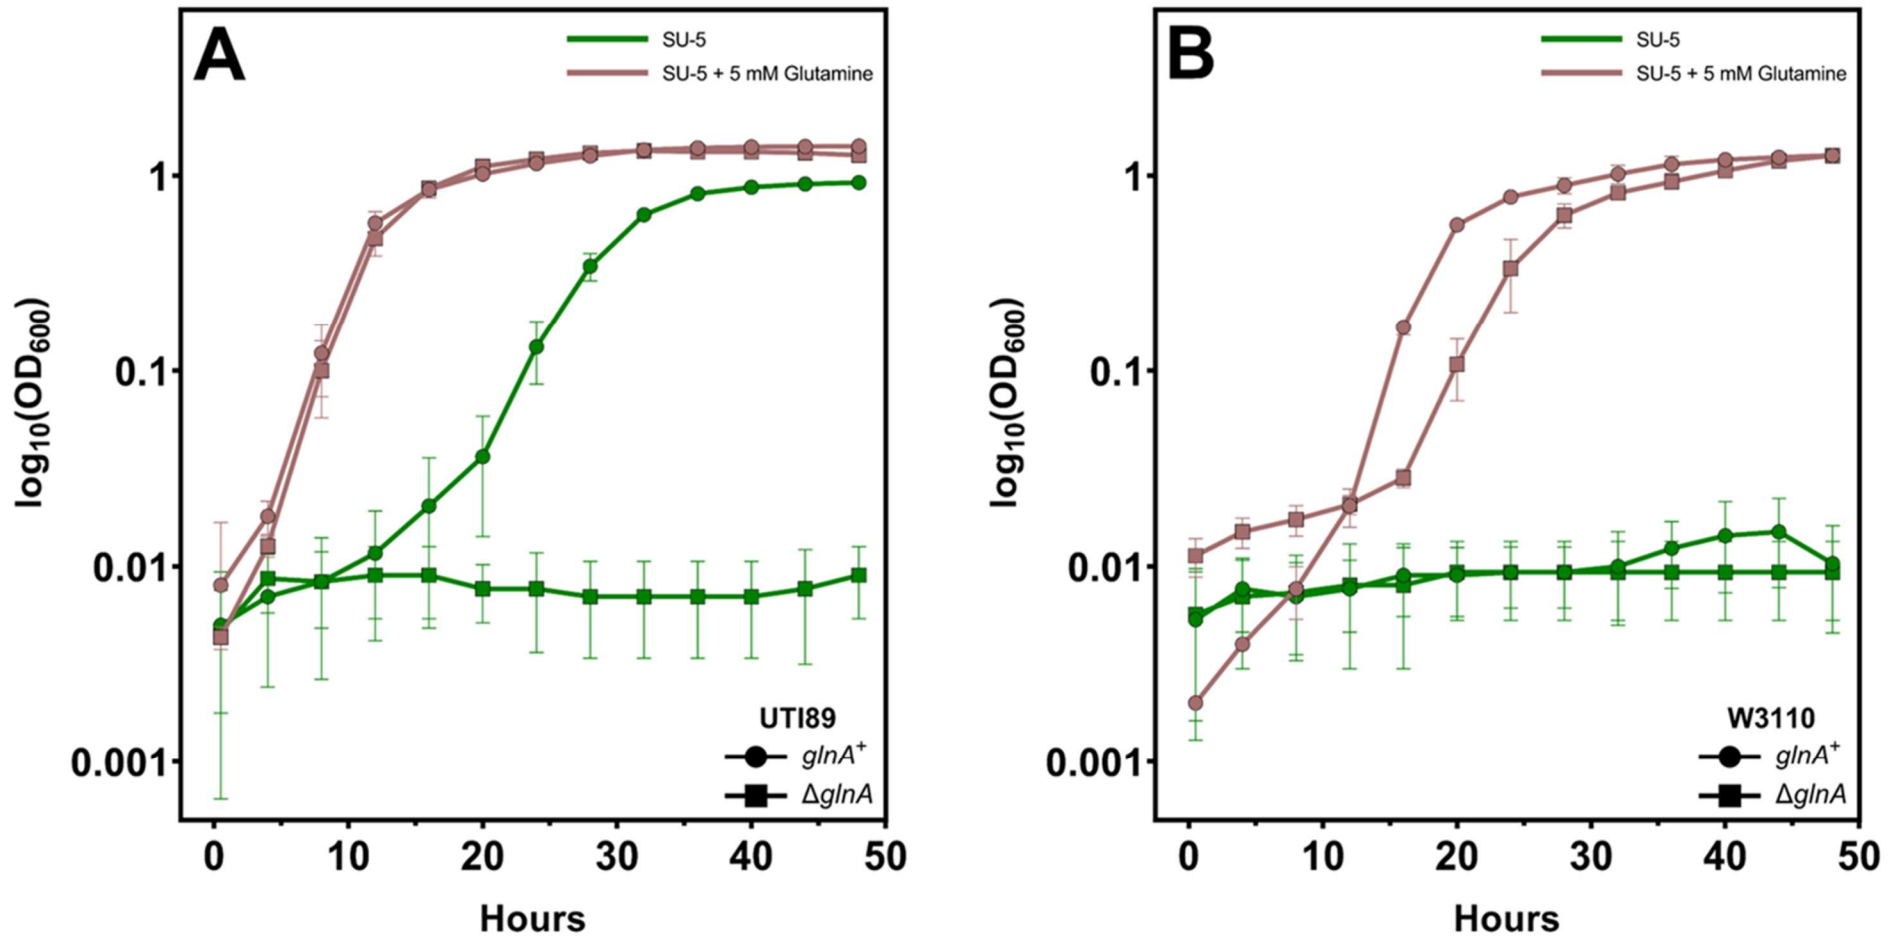

**Figure S2: Growth of UTI89 and W3110 in SU-5 medium with glutamine supplementation:** Growth in SU-5 medium with and without glutamine supplementation for **(A)** UTI89 and **(B)** W3110 strains. The WT strains recover growth upon glutamine addition in SU-5 medium. The  $\Delta$ *glnA* mutants for both UTI89 and W3110 also show growth comparable to the WT strains with glutamine in the medium. The curves are averages of three independent experiments and the error bars represent the standard deviations.



## FIG S3

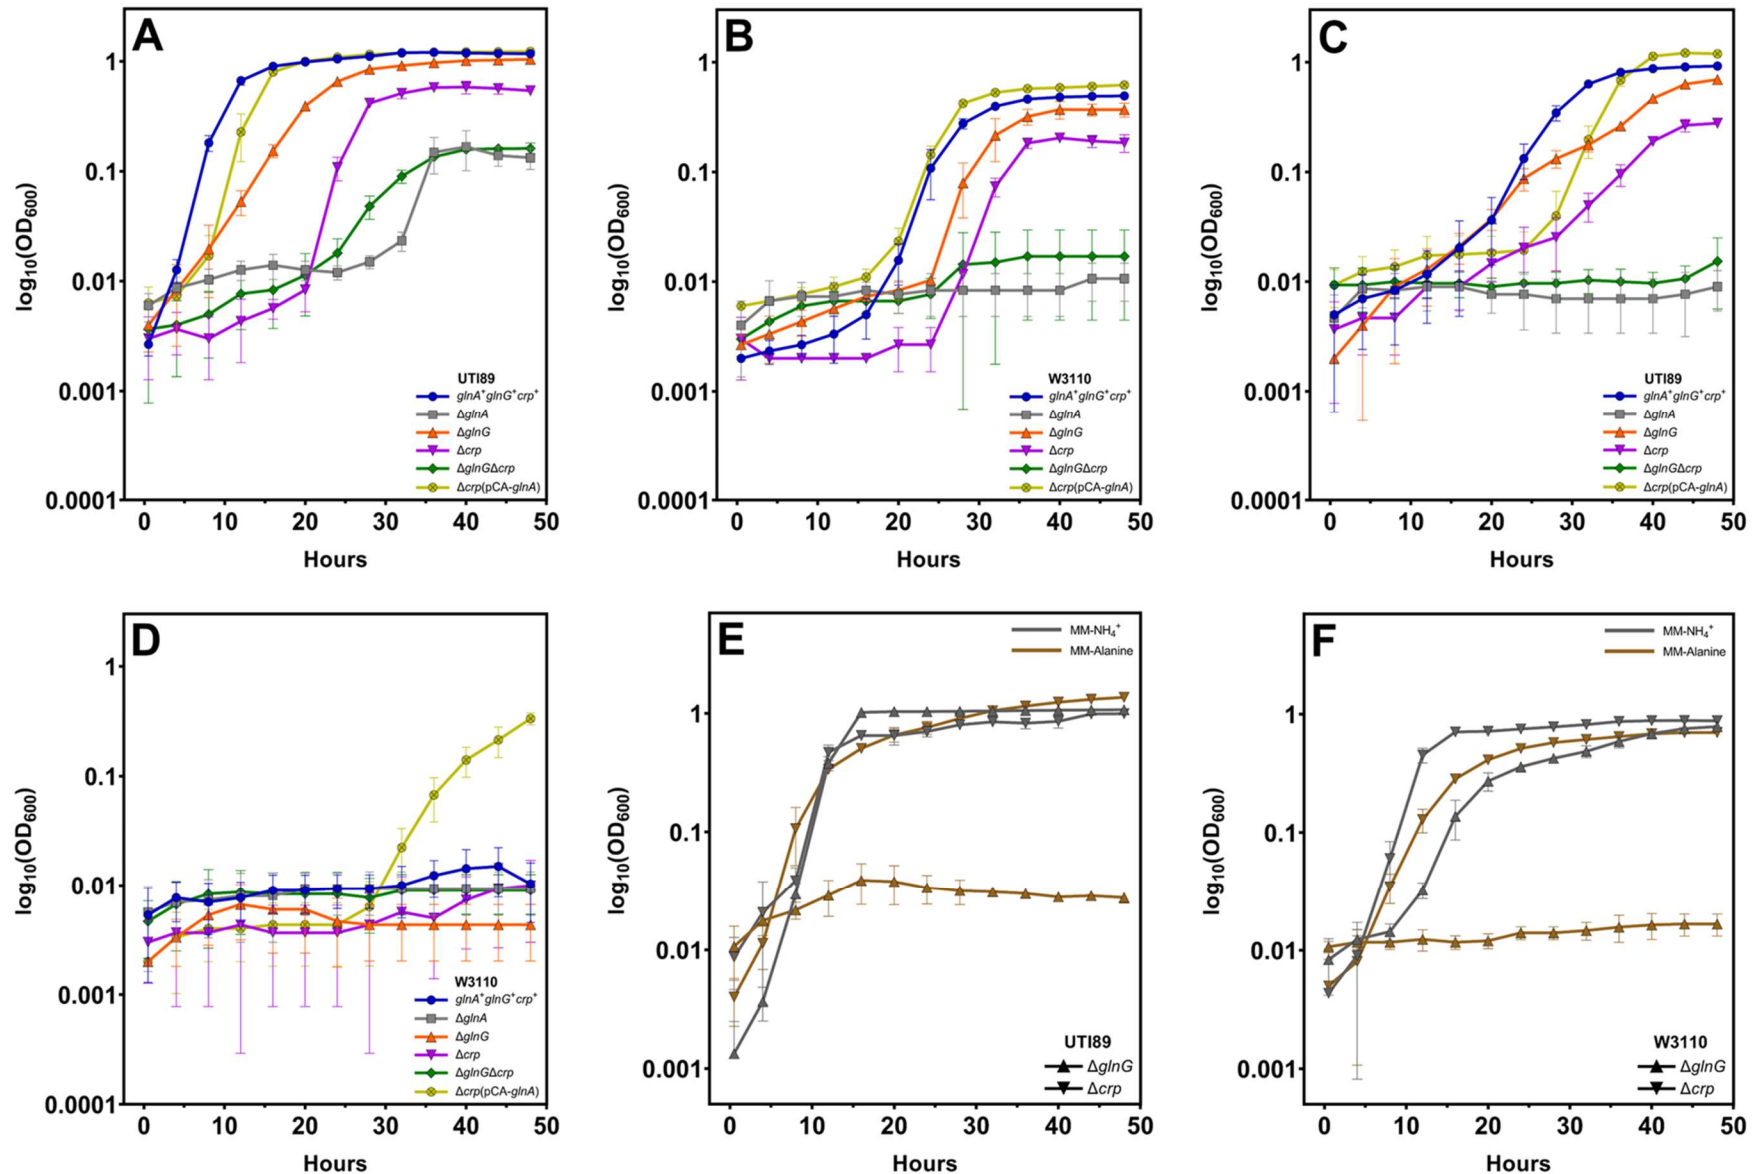

**Figure S3: Growth of UTI89 and W3110 mutants:** Growth of UTI89 and W3110 mutants in (A) and (B) SU-10 and in (C) and (D) SU-5 media – The  $\Delta glnG$  mutants had phenotypes like the WT strains. The  $\Delta crp$  mutants showed slower growth with significantly lower cell densities in both UTI89 and W3110. The  $\Delta glnG\Delta crp$  double mutants exhibited phenotypes like the  $\Delta glnA$  mutant. Overexpression of *glnA* in the  $\Delta crp$  mutants by an IPTG-inducible mechanism restored growth back to WT levels for UTI89. Overexpression of *glnA* in the W3110 $\Delta crp$  mutant also allowed for marginal growth in SU-5. Growth of  $\Delta crp$  and  $\Delta glnG$  mutants in indicated media for (E) UTI89 and (F) W3110 – The  $\Delta crp$  mutants grow as well as the WT strains in both MM-ammonia and MM-alanine media. The  $\Delta glnG$  mutants for both UTI89 and W3110 showed no viability in a nitrogen-limited medium. The curves are averages of three independent experiments and the error bars represent the standard deviations.
